# Supplementary material for: RNAseq revealed the important gene pathways controlling adaptive mechanisms under waterlogged stress in maize
Source: PubMed Central journal article supplement (PMC5591269; doi:10.1038/s41598-017-10561-1), 2017-09-08
Supplement: 41598_2017_10561_MOESM1_ESM.pdf [file 41598_2017_10561_MOESM1_ESM.pdf]

## **Supplementary Information**

### **RNAseq revealed the important gene pathways controlling adaptive mechanisms under waterlogged stress in maize**

Kanika Arora<sup>1,2</sup>, Kusuma Kumari Panda<sup>2</sup>, Shikha Mittal<sup>1</sup>, Mallana Gowdra Mallikarjuna<sup>1</sup>, Atmakuri Ramakrishna Rao<sup>3</sup>, Prasanta Kumar Dash<sup>4</sup>,  
Nepolean Thirunavukkarasu<sup>1\*</sup>



**Table S1. RNA sequencing yield and mapping results of HKI 1105 roots under non-stress and waterlogging stress conditions.**

| Treatment  | Number of paired reads | % of mapped reads | Genes RPKM>0 | Genes RPKM>1 | Genes RPKM>2 | Genes RPKM>5 |
|------------|------------------------|-------------------|--------------|--------------|--------------|--------------|
| Non-stress | 4,77,17,398            | 88                | 21364        | 12633        | 9092         | 4381         |
| Stress     | 4,49,04,070            | 84.073            | 21364        | 13872        | 10481        | 5396         |

**Table S2. Characteristics of single nucleotide polymorphisms (SNPs) mapped in maize roots under non-stress and waterlogging stress conditions.**

| Genomic regions      | SNPs mapped in non-stress sample |          | SNPs mapped in stress sample |          |
|----------------------|----------------------------------|----------|------------------------------|----------|
|                      | Read counts                      | Rate (%) | Read counts                  | Rate (%) |
| Downstream           | 66,880                           | 13.93%   | 60,365                       | 11.08%   |
| Exon                 | 47,941                           | 9.99%    | 40,133                       | 7.37%    |
| Intergenic           | 6,106                            | 1.27%    | 4,309                        | 0.79%    |
| Intron               | 78,945                           | 16.45%   | 43,845                       | 8.05%    |
| Splice site acceptor | 42,667                           | 8.89%    | 62,319                       | 11.44%   |
| Splice site donor    | 51,220                           | 10.67%   | 87,447                       | 16.06%   |
| Splice site region   | 1,02,022                         | 21.26%   | 1,66,235                     | 30.52%   |
| Transcript           | 226                              | 0.05%    | 215                          | 0.04%    |
| Upstream             | 48,503                           | 10.11%   | 49,902                       | 9.16%    |
| UTR 3'               | 21,827                           | 4.55%    | 18,751                       | 3.44%    |
| UTR 5'               | 13,662                           | 2.85%    | 11,167                       | 2.05%    |
| Total                | 4,79,999                         | –        | 5,44,688                     | –        |

**Table S3A. Amino acid substitutions in SNPs identified in non-stress expressed transcripts.** Rows represent amino acids in B73 maize genome while columns represent changed amino acids. Red colour indicates more changes happened and grey colour represents diagonals.

|   | *       | -       | ?          | A         | C       | D         | E         | F       | G         | H       | I         | K         | L         | M       | N         | P         | Q         | R         | S         | T         | V         | W       | Y       |
|---|---------|---------|------------|-----------|---------|-----------|-----------|---------|-----------|---------|-----------|-----------|-----------|---------|-----------|-----------|-----------|-----------|-----------|-----------|-----------|---------|---------|
| * | 34      | 5       |            | 3         | 5       | 2         | 5         | 20      | 6         | 3       | 1         | 3         | 31        |         |           |           | 37        | 48        | 8         | 3         | 5         | 9       | 14      |
| - | 72<br>2 |         | 15,99<br>4 | 1,51<br>3 | 66<br>9 | 1,45<br>8 | 1,80<br>3 | 88<br>6 | 1,65<br>2 | 70<br>3 | 2,07<br>9 | 2,44<br>3 | 3,29<br>2 | 69<br>9 | 1,67<br>0 | 957       | 873       | 1,47<br>4 | 1,77<br>1 | 1,52<br>4 | 1,88<br>1 | 45<br>9 | 80<br>5 |
| ? |         |         |            |           |         |           |           |         |           |         |           |           |           |         |           |           |           |           |           |           |           |         |         |
| A | 3       | 11<br>8 |            | 1,49<br>6 | 19      | 39        | 205       | 1       | 188       | 20      | 39        | 46        | 62        | 1       |           | 140       | 8         | 54        | 695       | 128       | 273       | 41      | 35      |
| C | 53      | 15      |            |           | 39<br>5 | 2         |           | 11<br>5 | 1         |         | 1         | 26        | 10        | 13      | 26        |           | 4         | 111       | 111       |           | 25        | 33      | 43      |
| D | 23      | 65      |            | 104       | 50      | 865       | 395       |         | 377       | 25      | 16        | 4         | 26        | 6       | 110       | 13        | 34        | 25        | 3         | 5         | 155       |         | 27<br>7 |
| E | 60<br>6 | 20<br>6 |            | 113       | 1       | 510       | 1,80<br>9 | 2       | 380       |         | 3         | 461       | 9         | 0       | 15        | 3         | 79        | 12        | 6         | 21        | 270       | 50      | 3       |
| F | 61      | 91      |            | 7         | 22      | 1         |           | 20<br>8 | 18        | 1       | 34        | 5         | 471       | 2       | 6         | 10        |           | 7         | 150       | 27        | 158       | 3       | 10      |
| G | 80      | 11<br>0 |            | 189       | 20<br>9 | 115       | 158       | 1       | 1,79<br>7 | 14      | 3         | 24        | 19        | 70      | 15        | 1         |           | 92        | 61        | 22        | 768       | 12<br>3 | 57      |
| H | 1       | 11      |            | 62        |         | 13        | 2         | 1       |           | 21<br>4 |           | 4         | 47        |         | 32        | 12        | 133       | 87        | 4         |           | 1         | 2       | 18<br>1 |
| I | 14      | 99      |            | 31        | 1       | 52        | 3         | 37      | 26        | 2       | 723       | 59        | 117       | 93      | 116       | 4         | 68        | 96        | 132       | 319       | 367       | 18      | 11      |
| K | 99      | 39<br>1 |            |           |         | 1         | 460       |         | 2         |         | 63        | 1,42<br>8 | 14        | 57      | 405       | 6         | 82        | 345       | 89        | 36        |           | 2       | 58      |
| L | 77      | 14<br>1 |            | 10        | 16<br>0 | 2         | 24        | 41<br>7 | 18        | 22<br>5 | 238       | 27        | 1,64<br>0 | 35      | 16        | 542       | 97        | 31        | 527       | 18        | 95        | 72      | 63      |
| M |         | 50      |            | 1         |         | 5         |           | 2       | 6         | 9       | 200       | 63        | 34        | 28<br>3 | 71        | 1         | 1         | 12        | 23        | 92        | 49        | 4       | 65      |
| N | 12      | 62      |            |           |         | 204       | 3         |         | 2         | 45      | 209       | 312       | 1         | 57      | 607       | 2         | 9         | 6         | 173       | 108       |           |         | 19      |
| P |         | 65      |            | 121       | 4       |           |           |         |           | 56      |           | 10        | 224       |         | 2         | 1,04<br>4 | 70        | 33        | 205       | 158       | 12        |         |         |
| Q | 30<br>5 | 75      |            | 6         |         | 24        | 19        | 5       | 8         | 29<br>8 | 9         | 33        | 108       | 3       | 7         | 55        | 2,23<br>8 | 169       | 18        | 6         | 5         | 2       | 1       |
| R | 37      | 10<br>2 |            | 9         | 32      | 1         | 40        |         | 154       | 59      | 29        | 61        | 210       | 14<br>4 | 6         | 36        | 21        | 1,62<br>2 | 449       | 44        | 9         | 49      | 5       |

|   |         |         |  |     |         |     |     |         |     |         |     |     |     |         |     |     |    |     |           |     |           |    |         |
|---|---------|---------|--|-----|---------|-----|-----|---------|-----|---------|-----|-----|-----|---------|-----|-----|----|-----|-----------|-----|-----------|----|---------|
| S | 13<br>9 | 25<br>9 |  | 30  | 16<br>9 | 3   | 6   | 20<br>3 | 258 | 4       | 295 | 48  | 341 | 2       | 46  | 276 | 3  | 161 | 2,12<br>0 | 342 | 6         | 1  | 7       |
| T |         | 33      |  | 583 | 7       |     | 69  |         | 6   | 7       | 497 | 69  | 11  | 32      | 108 | 40  |    | 71  | 27        | 847 | 3         |    | 1       |
| V | 21      | 24<br>9 |  | 632 | 33      | 132 | 196 | 13<br>0 | 255 | 68      | 248 | 108 | 381 | 11<br>3 | 71  | 9   | 63 | 293 | 136       | 33  | 1,53<br>9 | 16 | 9       |
| W | 67      | 7       |  |     | 68      | 69  |     | 2       | 10  | 1       |     | 3   | 49  |         |     |     |    | 148 | 1         |     |           | 46 |         |
| Y | 71      | 69      |  | 14  | 98      | 40  | 6   | 39      | 12  | 11<br>4 | 70  | 2   | 59  | 1       | 60  |     | 18 | 9   | 31        | 14  | 10        | 7  | 19<br>4 |

\*=termination

codon

-

=gap

?=unknow

n

**Table S3B. Amino acid substitutions in SNPs identified in stress expressed transcripts.** Rows represent amino acids in B73 maize genome while columns represent changed amino acids. Red colour indicates more changes happened and grey colour represents diagonals.

|   | *         | -       | ?          | A         | C         | D         | E         | F         | G         | H       | I         | K         | L         | M         | N         | P         | Q         | R         | S         | T         | V         | W       | Y         |
|---|-----------|---------|------------|-----------|-----------|-----------|-----------|-----------|-----------|---------|-----------|-----------|-----------|-----------|-----------|-----------|-----------|-----------|-----------|-----------|-----------|---------|-----------|
| * | 105       | 22      | 1          | 8         | 21        | 3         | 1         | 33        | 5         |         | 1         |           | 15        |           |           |           |           | 3         | 53        | 6         | 12        | 30      | 42        |
| - | 1,3<br>77 |         | 25,1<br>01 | 2,8<br>04 | 1,7<br>14 | 1,9<br>79 | 3,2<br>55 | 1,9<br>74 | 3,2<br>89 | 99<br>6 | 2,8<br>96 | 3,7<br>84 | 5,5<br>97 | 1,3<br>28 | 2,1<br>02 | 1,7<br>82 | 2,3<br>08 | 3,8<br>61 | 3,4<br>53 | 2,8<br>99 | 2,8<br>86 | 76<br>5 | 1,47<br>9 |
| ? |           |         |            |           |           |           |           |           |           |         |           |           |           |           |           |           |           |           |           |           |           |         |           |
| A | 36        | 79      |            | 1,2<br>29 | 13        | 97        | 112       | 16        | 323       | 56      | 44        | 137       | 69        | 10        | 21        | 119       | 48        | 117       | 140       | 101       | 130       | 42      | 30        |
| C | 33        | 34      |            | 7         | 332       |           |           | 21        | 5         |         |           | 13        | 36        | 14        | 25        | 6         |           | 111       | 23        |           | 11        | 26      | 29        |
| D | 75        | 73      |            | 48        | 3         | 944       | 323       | 19        | 67        | 10<br>4 | 30        | 25        | 55        | 8         | 81        | 14        | 36        | 64        | 21        | 26        | 79        |         | 115       |
| E | 162       | 19<br>1 |            | 158       | 18        | 256       | 2,9<br>25 | 11        | 197       |         | 32        | 65        | 28        | 21        | 140       | 9         | 124       | 59        | 61        | 21        | 241       | 75      | 82        |
| F | 3         | 34      |            | 1         | 146       | 9         | 5         | 211       | 27        |         | 26        | 1         | 203       | 9         | 17        | 4         |           | 11        | 196       | 74        | 57        | 12      | 60        |
| G | 68        | 13<br>4 |            | 190       | 36        | 115       | 227       | 3         | 1,7<br>45 | 14      | 7         | 75        | 47        | 44        | 19        | 4         | 20        | 141       | 85        | 8         | 295       | 98      | 12        |
| H | 1         | 7       |            | 37        |           | 6         | 5         | 1         |           | 20<br>4 |           | 1         | 8         |           |           | 5         | 85        | 42        | 14        | 1         |           | 1       | 29        |
| I | 45        | 49      |            | 58        |           | 57        | 63        | 4         | 26        | 18      | 549       | 99        | 77        | 82        | 44        | 104       | 92        | 98        | 20        | 159       | 131       | 3       | 174       |
| K | 23        | 12<br>8 |            |           | 2         | 39        | 201       | 13        | 4         | 27      | 33        | 3,0<br>21 | 27        | 15        | 499       | 11        | 41        | 123       | 48        | 19        | 14        | 3       | 20        |
| L | 21        | 87      |            | 7         | 159       | 7         | 27        | 211       | 14        | 44      | 99        | 54        | 2,1<br>36 | 14        |           | 137       | 41        | 33        | 272       | 56        | 58        | 18      | 48        |
| M | 22        | 78      |            |           | 1         |           |           |           | 3         | 10      | 358       | 60        | 24        | 397       | 5         | 2         | 14        | 127       | 120       | 281       | 14        |         | 63        |
| N | 16        | 50      |            | 12        |           | 39        |           |           | 12        | 3       | 158       | 233       | 17        | 37        | 334       | 1         | 1         | 24        | 61        | 22        | 4         | 2       | 65        |
| P | 7         | 34      |            | 70        | 18        | 6         |           |           | 4         | 15<br>9 | 3         | 4         | 193       |           | 105       | 753       | 130       | 15        | 45        | 27        | 8         |         | 1         |
| Q | 11        | 11<br>1 |            | 8         | 10        | 18        | 38        | 9         | 10        | 25<br>1 | 13        | 23        | 156       |           |           | 84        | 3,0<br>71 | 29        | 34        | 95        | 5         |         | 3         |
| R | 16        | 12      |            | 11        | 108       | 8         | 35        | 9         | 121       | 31      | 25        | 135       | 55        | 18        | 13        | 18        | 13        | 1,6       | 249       | 38        |           | 4       | 2         |

|   |     |         |  |     |     |     |     |     |     |    |     |     |     |     |     |     |    |     |           |           |           |         |     |
|---|-----|---------|--|-----|-----|-----|-----|-----|-----|----|-----|-----|-----|-----|-----|-----|----|-----|-----------|-----------|-----------|---------|-----|
|   |     | 3       |  |     |     |     |     |     |     |    |     |     |     |     |     |     | 10 |     |           |           |           |         |     |
| S | 100 | 13<br>3 |  | 27  | 110 | 78  | 12  | 135 | 39  | 12 | 105 | 127 | 62  | 56  | 55  | 104 | 5  | 175 | 2,3<br>63 | 82        | 13        | 15      | 28  |
| T | 3   | 62      |  | 265 |     | 24  | 69  | 3   | 80  | 31 | 160 | 50  | 27  | 73  | 41  | 5   | 2  | 18  | 12        | 1,0<br>75 | 3         | 2       | 12  |
| V | 89  | 16<br>0 |  | 418 | 91  | 222 | 220 | 67  | 249 | 54 | 147 | 289 | 276 | 152 | 171 | 37  | 93 | 157 | 183       | 46        | 1,6<br>98 | 22      | 17  |
| W | 131 | 7       |  | 6   | 198 |     |     | 5   | 3   | 3  | 1   | 2   | 23  | 2   | 1   |     |    | 18  | 2         |           | 13        | 12<br>0 | 4   |
| Y | 69  | 46      |  | 18  | 75  | 28  | 2   | 27  | 11  | 83 | 40  | 4   | 401 | 1   | 17  | 1   | 12 | 65  | 33        | 14        | 35        | 8       | 226 |

\*=termination

codon

-

=ga

p

?=unknow

n

**Table S4. Maize gene expression of Energy-Production Pathway related genes.**

| Gene name                    | Gene ID         | Annotation                                                   | Root (Fold change) |
|------------------------------|-----------------|--------------------------------------------------------------|--------------------|
| Lactate dehydrogenase (LDH)  | GRMZM2G128929   | L-lactate dehydrogenase                                      | -3.212497736       |
|                              | GRMZM2G136072   | Glyoxylate reductase                                         | 1.173986375        |
|                              | GRMZM2G074282   | hydroxypyruvate reductase                                    | -1.559328686       |
|                              | GRMZM2G159587   | Glyoxylate reductase                                         | -4.088633483       |
|                              | GRMZM2G049811   | Uncharacterized protein                                      | 1.290277478        |
| Alcohol dehydrogenase (ADH)  | GRMZM2G442658   | Alcohol dehydrogenase 1                                      | 1.432565675        |
|                              | GRMZM2G152981   | Uncharacterized protein                                      | 7.581995337        |
|                              | GRMZM2G149272   | GroES-like zinc-binding dehydrogenase family protein         | 1.335785779        |
|                              | GRMZM2G139512   | Putative alcohol dehydrogenase superfamily protein           | -1.600840623       |
|                              | GRMZM2G154007   | Uncharacterized protein                                      | 1.625654786        |
|                              | GRMZM2G008728   | Uncharacterized protein                                      | -1.195732434       |
|                              | GRMZM2G024303   | Uncharacterized protein                                      | 2.388562704        |
|                              | AC197705.4_FG00 |                                                              |                    |
| Pyruvate decarboxylase (PDC) | 1               | Pyruvate decarboxylase isozyme 1                             | 3.729852545        |
|                              | GRMZM2G038821   | Pyruvate decarboxylase isozyme 2                             | -1.721529887       |
|                              | GRMZM2G087186   | Pyruvate decarboxylase isozyme 3                             | 1.140414241        |
| Sucrose synthase (SUS)       | GRMZM2G152908   | Sucrose synthase 2                                           | 7.341513957        |
|                              | GRMZM2G055331   | Putative sucrose-phosphate synthase family protein isoform 1 | 1.97603525         |
|                              | GRMZM2G008507   | Putative sucrose-phosphate synthase family protein           | 2.568095195        |
|                              | GRMZM2G318780   | Sucrose synthase                                             | 2.054476156        |
|                              | GRMZM2G140107   | unknown                                                      | -1.923416289       |
|                              | GRMZM2G462613   | unknown                                                      | 1.411547519        |
|                              | GRMZM2G318780   | Sucrose synthase                                             | 2.054476156        |
| Invertase (INV)              | GRMZM2G119689   | Beta-fructofuranosidase, insoluble isoenzyme 2               | 48.59578188        |
|                              | GRMZM2G084940   | unknown                                                      | 1.759401624        |



|                           |                  |                                            |              |
|---------------------------|------------------|--------------------------------------------|--------------|
|                           | GRMZM2G040843    | alkaline/neutral invertase                 | -1.135731523 |
|                           | GRMZM2G136139    | Neutral/alkaline invertase                 | -18.17170437 |
|                           | GRMZM2G139300    | Beta-fructofuranosidase, cell wall isozyme | -1.982367749 |
|                           | AC213432.2_FG004 | Uncharacterized protein                    | -4.008464199 |
|                           | GRMZM2G022782    | Uncharacterized protein                    | 1.042685267  |
|                           | GRMZM2G118737    | Uncharacterized protein                    | 1.184594685  |
|                           | GRMZM2G175499    | Pectinesterase                             | 3.057256184  |
|                           | GRMZM2G136106    | Pectinesterase                             | 15.40857117  |
|                           | GRMZM2G007277    | Uncharacterized protein                    | -1.032483203 |
|                           | GRMZM2G115451    | Uncharacterized protein                    | 19.07727859  |
|                           | GRMZM2G170842    | Uncharacterized protein                    | 3.0980196    |
|                           | GRMZM2G084694    | unknown                                    | -1.168180995 |
|                           | GRMZM2G089836    | Invertase                                  | 19.81102007  |
| Hexokinase                | GRMZM2G104081    | Uncharacterized protein                    | 3.06837348   |
|                           | GRMZM2G046686    | Hexokinase-1                               | 35.58646199  |
|                           | GRMZM2G051806    | Hexokinase-1                               | 2.262369576  |
|                           | GRMZM2G467069    | Uncharacterized protein                    | 2.31315112   |
|                           | GRMZM2G432801    | Hexokinase-2                               | 1.486296853  |
|                           | GRMZM2G058745    | Uncharacterized protein                    | 1.514821129  |
|                           | GRMZM2G171373    | Uncharacterized protein                    | 12.84047597  |
| Phosphoglucose isomerase  | GRMZM2G065083    | unknown                                    | 1.265869317  |
|                           | GRMZM2G140614    | Glucose-6-phosphate isomerase              | 2.082124386  |
| Phosphofructokinase (PFK) | GRMZM5G879882    | Uncharacterized protein                    | 7.283063621  |
|                           | GRMZM2G127717    | unknown                                    | 2.377322409  |
|                           | GRMZM2G059151    | Uncharacterized protein                    | 2.308584577  |
|                           | GRMZM2G443985    | Uncharacterized protein                    | 1.434131083  |
|                           | GRMZM2G132069    | Uncharacterized protein                    | -1.362877828 |
|                           | GRMZM2G004932    | Uncharacterized protein                    | 2.729003415  |
|                           | GRMZM2G139360    | Uncharacterized protein                    | 2.292942138  |

|                                                  |               |                                          |              |
|--------------------------------------------------|---------------|------------------------------------------|--------------|
|                                                  | GRMZM2G324471 | Uncharacterized protein                  | -1.068496217 |
| Fructose-6-bisphosphate aldolase (ALD)           | GRMZM2G057823 | Fructose-bisphosphate aldolase           | 1.612832182  |
|                                                  | GRMZM2G066024 | Fructose-bisphosphate aldolase           | 1.022441779  |
|                                                  | GRMZM2G089365 | Fructose-bisphosphate aldolase           | -1.460226244 |
|                                                  | GRMZM2G069195 | Fructose-bisphosphate aldolase           | -1.060016088 |
| Triose phosphate isomerase (TPI)                 | GRMZM2G030784 | Triosephosphate isomerase                | 1.231336284  |
| Glyceraldehyde-3-phosphate dehydrogenase (GAPDH) | GRMZM2G051004 | Glyceraldehyde-3-phosphate dehydrogenase | 3.293304801  |
|                                                  | GRMZM2G104632 | Glyceraldehyde-3-phosphate dehydrogenase | 2.650101596  |
|                                                  | GRMZM2G176307 | Uncharacterized protein                  | 2.159525483  |
| Phosphoglycerate kinase (PGK)                    | GRMZM2G003724 | Phosphoglycerate kinase                  | 8.804897811  |
|                                                  | GRMZM2G382914 | Phosphoglycerate kinase                  | 2.107393457  |
|                                                  | GRMZM2G047028 | Phosphoglycerate kinase                  | 1.85881176   |
|                                                  | GRMZM2G089136 | Phosphoglycerate kinase                  | 2.934965937  |
| 3-Phosphoglycerate dehydrogenase (PHGDH)         | GRMZM2G073814 | Uncharacterized protein                  | 1.65091834   |
|                                                  | GRMZM2G009323 | Uncharacterized protein                  | 2.65981288   |
|                                                  | GRMZM2G073814 | Uncharacterized protein                  | 1.65091834   |
| Enolase (ENO)                                    | GRMZM2G034848 | Enolase                                  | 1.729533499  |
|                                                  | GRMZM2G481529 | unknown                                  | -1.20253926  |

---

**Table S5. Maize gene expression of Programmed Cell Death related genes.**

| <b>Gene name</b>                         | <b>Gene ID</b>                      | <b>Annotation</b>                                        | <b>Root (Fold change)</b>         |              |
|------------------------------------------|-------------------------------------|----------------------------------------------------------|-----------------------------------|--------------|
| Bifunctional nuclease 1 (BFN1)           | GRMZM2G112968                       | Putative bifunctional nuclease                           | 3.249426573                       |              |
| Metallothionein (MT)                     | GRMZM2G099340                       | metallothionein-like protein type 2                      | 1.247360523                       |              |
|                                          | GRMZM2G402564                       | Metallothionein2                                         | -5.45151131                       |              |
|                                          | GRMZM2G430807                       | metallothionein-like protein type 2                      | -6.814389138                      |              |
|                                          |                                     |                                                          |                                   |              |
| Mitogen-activated Protein Kinase (MAPK)  | GRMZM2G007848                       | Putative uncharacterized protein                         | 1.790329222                       |              |
|                                          | GRMZM2G007854                       | hypothetical protein LOC100192548                        | -1.202887822                      |              |
|                                          | GRMZM2G025242                       | MAPK activating protein Putative uncharacterized protein | 1.392441226                       |              |
|                                          | GRMZM2G048455                       | Putative uncharacterized protein                         | 1.164203155                       |              |
|                                          | GRMZM2G062914                       | MPK14-putative uncharacterized protein                   | -1.186950788                      |              |
|                                          | GRMZM2G089484                       | product :mitogen activated protein kinase 6              | 1.802451907                       |              |
|                                          | GRMZM2G102088                       | Putative uncharacterized protein                         | 1.028642368                       |              |
|                                          | GRMZM2G104283                       | Putative uncharacterized protein                         | -1.29671871                       |              |
|                                          | GRMZM2G122335                       | hypothetical protein LOC100279919                        | 3.271765307                       |              |
|                                          | GRMZM2G135904                       | MAP kinase activity                                      | 2.112286091                       |              |
|                                          | GRMZM2G306028                       | hypothetical protein LOC100277192                        | 1.199385119                       |              |
|                                          | Plant aspartic protease A3 (PASPA3) | GRMZM2G036134                                            | hypothetical protein LOC100191400 | 18.71040785  |
|                                          |                                     | GRMZM2G065757                                            | aspartic proteinase oryzasin-1    | -1.147203559 |
| GRMZM2G128922                            |                                     | Aspartic proteinase nepenthesin-1                        | 1.100612226                       |              |
| GRMZM2G153523                            |                                     | Hypothetical protein LOC100279644                        | 1.141375642                       |              |
| GRMZM2G177575                            |                                     | Aspartic-type endopeptidase/ pepsin A                    | 2.134520682                       |              |
| GRMZM2G339736                            |                                     | transcription factor activity                            | 3.852142792                       |              |
| Respiratory Burst Oxidase Homolog (RBOH) | GRMZM2G022547                       | fae2 protein                                             | 1.951894822                       |              |
|                                          | GRMZM2G034896                       | hypothetical protein LOC100384248                        | 12.16466145                       |              |
|                                          | GRMZM2G043435                       | product:respiratory burst oxidase-like protein C         | 1.274008846                       |              |

|               |                                                                           |              |
|---------------|---------------------------------------------------------------------------|--------------|
| GRMZM2G138152 | respiratory burst oxidase protein B                                       | -1.086739183 |
| GRMZM2G300965 | hypothetical protein LOC100381459                                         | 1.004067294  |
| GRMZM2G441541 | oxidoreductase activity, acting on NADH or NADPH, with oxygen as acceptor | -1.214738933 |
| GRMZM2G441541 | oxidoreductase activity, acting on NADH or NADPH, with oxygen as acceptor | 6.114512369  |
| GRMZM2G448185 | oxidoreductase activity, acting on NADH or NADPH, with oxygen as acceptor | 4.12292834   |

---

**Table S6. Maize gene expression of aerenchyma formation related genes.**

| Gene name     | Gene ID         | Annotation                                         | Root (Fold change) |
|---------------|-----------------|----------------------------------------------------|--------------------|
| Expansins     | GRMZM2G004955   | transcription factor activity                      | 6.9705441          |
|               | GRMZM2G013002   | product:beta-expansin 8                            | 8.909718023        |
|               | GRMZM2G021621   | Beta-expansin 1a Putative uncharacterized protein  | -1.299651537       |
|               | GRMZM2G026147   | Expansin-like 3 Putative uncharacterized protein   | 2.568095195        |
|               | GRMZM2G026956   | hypothetical protein LOC100216633                  | -1.362877828       |
|               | GRMZM2G056236   | hypothetical protein LOC100273516                  | 2.934965937        |
|               | GRMZM2G072121   | hypothetical protein LOC100191303                  | -1.344208268       |
|               | GRMZM2G094523   | Putative uncharacterized protein                   | 41.8232646         |
|               | GRMZM2G095968   | expansin-like 3 (LOC100285844), mRNA               | -1.115081859       |
|               | GRMZM2G103672   | beta-expansin 4                                    | 3.668707421        |
|               | GRMZM2G105844   | alpha expansin2                                    | 2.218694488        |
|               | GRMZM2G114322   | TSA: Zea mays contig17568, mRNA sequence           | 15.40857117        |
|               | GRMZM2G120724   | Alpha-expansin 13 Putative uncharacterized protein | 1.696777182        |
|               | GRMZM2G127072   | Putative uncharacterized protein                   | 2.641469343        |
|               | GRMZM2G169967   | beta-expansin 3                                    | 13.73144778        |
|               | GRMZM2G176595   | product:beta-expansin 6                            | 1.467482969        |
|               | GRMZM2G177391   | beta-expansin 1a                                   | 7.704285585        |
|               | GRMZM2G342246   | product:beta-expansin 7                            | 20.06782959        |
|               | GRMZM2G361064   | alpha-expansin 5                                   | 5.13619039         |
|               | GRMZM2G445169   | alpha-expansin 6                                   | 1.11472264         |
| GRMZM2G474194 | Beta-expansin 3 | 4.151432082                                        |                    |
| GRMZM5G859316 | Beta-expansin 4 | 3.668707421                                        |                    |
| Pectin lyases | GRMZM2G005562   | Pectate lyase 4                                    | -1.369187447       |
|               | GRMZM2G131912   | pectate lyase 8                                    | -1.166173811       |
|               | GRMZM2G412207   | Hypothetical protein LOC100273705                  | 1.170020205        |
|               | GRMZM2G472060   | pectate lyase 12                                   | -1.544594871       |

"

|                                 |                  |                                                                                        |              |
|---------------------------------|------------------|----------------------------------------------------------------------------------------|--------------|
| Polygalacturonases              | AC231180.2_FG006 | Uncharacterized protein                                                                | 11.73986375  |
|                                 | GRMZM2G026855    | hypothetical protein LOC100273291                                                      | -2.756730151 |
|                                 | GRMZM2G037431    | polygalacturonase                                                                      | 8.337971412  |
|                                 | GRMZM2G052844    | 6-phosphofructokinase complex                                                          | 1.687605414  |
|                                 | GRMZM2G057296    | hypothetical protein LOC100272593                                                      | 1.85881176   |
|                                 | GRMZM2G079617    | polygalacturonase (LOC100285007), mRNA                                                 | 1.467482969  |
|                                 | GRMZM2G092746    | Rho guanyl-nucleotide exchange factor activity                                         | 2.201224453  |
|                                 | GRMZM2G113815    | polygalacturonase (LOC100282607), mRNA                                                 | 1.875117126  |
|                                 | GRMZM2G119494    | Glycoside hydrolase, family 28 Putative uncharacterized protein                        | -2.504149504 |
|                                 | GRMZM2G130401    | Transcribed locus                                                                      | 1.956643958  |
|                                 | GRMZM2G135763    | hypothetical protein LOC100273073                                                      | 1.226552929  |
|                                 | GRMZM2G137077    | polygalacturonase (LOC100282589), mRNA                                                 | -1.045929496 |
|                                 | GRMZM2G139828    | hypothetical protein LOC100191454                                                      | 2.568095195  |
|                                 | GRMZM2G174598    | Putative uncharacterized protein                                                       | 5.503061132  |
|                                 | GRMZM2G179696    | Putative uncharacterized protein                                                       | 2.297452844  |
|                                 | GRMZM2G348602    | Clone 1560552 mRNA sequence                                                            | 1.04820212   |
|                                 | GRMZM2G467435    | hypothetical protein LOC100194076                                                      | 16.14231265  |
|                                 | GRMZM5G831200    | hypothetical protein LOC100194130                                                      | 5.869931874  |
|                                 | GRMZM5G882418    | polygalacturonase (LOC100285112), mRNA                                                 | 5.936635645  |
| Xyloglucan<br>transglycosylases | GRMZM2G039919    | hypothetical protein LOC100382994 (LOC100382994), mRNA                                 | 5.869931874  |
|                                 | GRMZM2G060837    | Putative uncharacterized protein                                                       | 10.76154177  |
|                                 | GRMZM2G112198    | hypothetical protein                                                                   | 3.668707421  |
|                                 | GRMZM2G128876    | Xyloglucan endotransglycosylase/hydrolase protein 8                                    | -2.101103317 |
|                                 | GRMZM2G180870    | Glycosyl hydrolases family 16 protein                                                  | -1.070832579 |
|                                 | GRMZM2G319798    | hydrolase activity, hydrolyzing O-glycosyl compounds                                   | 7.337414843  |
|                                 | GRMZM2G364748    | Putative uncharacterized protein Xyloglucan endotransglycosylase/hydrolase protein 8 ; | -1.382347511 |
|                                 | GRMZM2G392125    | xyloglucan endotransglucosylase/hydrolase protein 15                                   | -1.930743589 |

|               |                                                      |              |
|---------------|------------------------------------------------------|--------------|
| GRMZM2G413006 | Xyloglucan endotransglucosylase/hydrolase protein 23 | 1.834353711  |
| GRMZM2G413044 | Xyloglucan endotransglucosylase/hydrolase protein 32 | -1.533237556 |

---

**Table S7. Maize gene expression of ethylene-responsive pathway related genes.**

| <b>Gene name</b>   | <b>Gene ID</b>                       | <b>Annotation</b>                                                          | <b>Root (Fold change)</b>                |             |
|--------------------|--------------------------------------|----------------------------------------------------------------------------|------------------------------------------|-------------|
| ACC synthase (ACS) | AC197672.3_F<br>G002                 | Acetyl-CoA carboxylase Fragment                                            | 2.662150513                              |             |
|                    | GRMZM2G37<br>7341                    | Putative uncharacterized protein                                           | 1.243284182                              |             |
| ERF VII            | GRMZM2G01<br>8398                    | Ethylene response element binding protein Putative uncharacterized protein | 2.827321228                              |             |
|                    | GRMZM2G05<br>2667                    | vacuolar protein-sorting protein 45                                        | -2.903522328                             |             |
|                    | GRMZM2G05<br>3503                    | ethylene-responsive factor-like protein 1                                  | -6.673401776                             |             |
|                    | GRMZM2G08<br>5964                    | Ethylene responsive element binding protein 2                              | -2.84426677                              |             |
|                    | GRMZM2G11<br>0333                    | ethylene response element binding protein (LOC100283876), mRNA             | 1.273505335                              |             |
|                    | GRMZM2G14<br>8333                    | Ethylene response factor Putative uncharacterized protein                  | -3.196873916                             |             |
|                    | GRMZM2G16<br>9382                    | ethylene-responsive factor-like protein 1                                  | -2.141665158                             |             |
|                    | GRMZM2G17<br>1179                    | Putative uncharacterized protein                                           | 1.311840836                              |             |
|                    | Methionine aminopeptidase<br>(MetAP) | GRMZM2G00<br>2879                                                          | Methionine aminopeptidase (EC 3.4.11.18) | 1.135791613 |
|                    |                                      | GRMZM2G06<br>8982                                                          | Methionine aminopeptidase (EC 3.4.11.18) | 3.48527205  |
| GRMZM2G10<br>1438  |                                      | hypothetical protein LOC100280388                                          | -1.125855597                             |             |
| GRMZM2G11<br>3062  |                                      | hypothetical protein LOC100274208                                          | 1.546225957                              |             |
| GRMZM2G13          |                                      | Hypothetical protein LOC100191629                                          | 1.540857117                              |             |



|                                         |               |                                                      |              |
|-----------------------------------------|---------------|------------------------------------------------------|--------------|
|                                         | 1473          |                                                      |              |
|                                         | GRMZM5G83     |                                                      |              |
|                                         | 7364          | methionine aminopeptidase 1A                         | -1.116399923 |
| Arginyl-tRNA--protein transferase (ATE) | GRMZM2G160556 | hypothetical protein LOC100383012                    | 1.074671871  |
| E3 ubiquitin ligases_SKP1               | GRMZM2G029307 | hypothetical protein LOC100273625                    | 1.956643958  |
|                                         | GRMZM2G032562 | SKP1-like protein 1B                                 | 5.319625761  |
|                                         | GRMZM2G052241 | LOC100274693                                         | 1.467482969  |
|                                         | GRMZM2G074282 | Putative uncharacterized protein                     | -1.559328686 |
|                                         | GRMZM2G101446 | SKP1-like protein 1A                                 | -1.268793559 |
|                                         | GRMZM2G109725 | Putative uncharacterized protein                     | 1.634242397  |
|                                         | GRMZM2G142825 | Putative uncharacterized protein                     | 1.971031046  |
| E3 ubiquitin ligases_RBX1               | GRMZM2G035341 | RING-box protein 1a                                  | 1.117876732  |
|                                         | GRMZM2G057150 | hypothetical protein LOC100383383                    | -1.135731523 |
|                                         | GRMZM2G361074 | Putative uncharacterized protein RING-box protein 1a | 1.100612226  |
| E3 ubiquitin ligases_Cullin related     | GRMZM2G027750 | cullin-RING ubiquitin ligase complex                 | 1.150640055  |
|                                         | GRMZM2G126253 | cullin-RING ubiquitin ligase complex                 | 2.405899709  |
|                                         | GRMZM2G166089 | cullin-RING ubiquitin ligase complex                 | 1.23483323   |
|                                         | GRMZM2G166694 | cullin-RING ubiquitin ligase complex                 | 1.199828842  |

|                                     |                      |                                                                                                         |              |
|-------------------------------------|----------------------|---------------------------------------------------------------------------------------------------------|--------------|
| E3 ubiquitin ligases_RING<br>Finger | GRMZM2G16<br>8886    | cullin-RING ubiquitin ligase complex                                                                    | 1.735924975  |
|                                     | GRMZM2G38<br>0184    | Putative uncharacterized protein                                                                        | 1.634967438  |
|                                     | AC177897.2_F<br>G002 | hypothetical protein LOC100274874                                                                       | 20.17789082  |
|                                     | AC191534.3_F<br>G003 | Transcribed locus, moderately similar to NP_001170535.1 hypothetical protein<br>LOC100384551 [Zea mays] | 2.130217212  |
|                                     | AC197705.4_F<br>G006 | LOC100274105                                                                                            | 1.095136544  |
|                                     | AC210013.4_F<br>G009 | RING/U-box superfamily protein                                                                          | 1.173986375  |
|                                     | AC211190.4_F<br>G004 | unknown protein                                                                                         | 1.100612226  |
|                                     | AC212353.4_F<br>G004 | hypothetical protein LOC100304207                                                                       | 1.91901619   |
|                                     | AC213654.3_F<br>G001 | hypothetical protein LOC100194242                                                                       | 1.351158099  |
|                                     | AC225564.3_F<br>G003 | cysteine-type endopeptidase activity                                                                    | -1.817170437 |
|                                     | AC231747.1_F<br>G001 | hypothetical protein LOC100217064                                                                       | 1.028974744  |
|                                     | AC233939.1_F<br>G003 | Nitric oxide synthase interacting protein Putative uncharacterized protein                              | -1.362877828 |
|                                     | GRMZM2G00<br>0014    | hypothetical protein LOC100274308                                                                       | 1.008894541  |
|                                     | GRMZM2G00<br>0114    | Protein binding protein Putative uncharacterized protein                                                | 1.409277514  |
|                                     | GRMZM2G00<br>1024    | hypothetical protein LOC100191719                                                                       | -1.072130558 |
|                                     | GRMZM2G00<br>1114    | hypothetical protein LOC100191467                                                                       | 1.867705596  |
|                                     | GRMZM2G00            | hypothetical protein LOC100191204                                                                       | 12.96276622  |

|           |                                                                                     |              |
|-----------|-------------------------------------------------------------------------------------|--------------|
| 2280      |                                                                                     |              |
| GRMZM2G00 |                                                                                     |              |
| 3656      | Putative uncharacterized protein RING finger protein 13                             | 1.517614374  |
| GRMZM2G00 |                                                                                     |              |
| 3725      | hypothetical protein LOC100192054 (LOC100192054), mRNA                              | 1.559200654  |
| GRMZM2G00 |                                                                                     |              |
| 4023      | hypothetical protein LOC100193216                                                   | 1.032357205  |
| GRMZM2G00 |                                                                                     |              |
| 4422      | hypothetical protein LOC100274167                                                   | -1.606248868 |
| GRMZM2G00 |                                                                                     |              |
| 5365      | Ubiquitin ligase protein FANCL                                                      | 2.843248252  |
| GRMZM2G00 |                                                                                     |              |
| 5840      | RING-H2 finger protein                                                              | 2.201224453  |
| GRMZM2G00 | Transcribed locus, moderately similar to XP_002459697.1 hypothetical protein        |              |
| 6399      | SORBIDRAFT_02g009010 [Sorghum bicolor]                                              | 8.438027069  |
| GRMZM2G00 |                                                                                     |              |
| 6428      | Putative uncharacterized protein                                                    | 3.335188565  |
| GRMZM2G00 |                                                                                     |              |
| 7288      | hypothetical protein LOC100276421                                                   | 1.907727859  |
| GRMZM2G00 |                                                                                     |              |
| 9265      | Putative uncharacterized protein Ubiquitin ligase SINAT5                            | 2.171874793  |
| GRMZM2G01 |                                                                                     |              |
| 1473      | hypothetical protein LOC100216604                                                   | -1.022158371 |
| GRMZM2G01 |                                                                                     |              |
| 3892      | Putative uncharacterized protein Ubiquitin-protein ligase/ zinc ion binding protein | -1.228509591 |
| GRMZM2G01 |                                                                                     |              |
| 3971      | ubiquitin ligase complex                                                            | 2.170651891  |
| GRMZM2G01 |                                                                                     |              |
| 5409      | Putative uncharacterized protein RING-H2 finger protein ATL5F                       | -1.734571781 |
| GRMZM2G01 |                                                                                     |              |
| 7636      | hypothetical protein LOC100279788                                                   | -4.088633483 |
| GRMZM2G01 |                                                                                     |              |
| 8070      | RING-H2 finger protein                                                              | -1.029111829 |

|           |      |                                                      |              |
|-----------|------|------------------------------------------------------|--------------|
| GRMZM2G01 | 8798 | TSA: Zea mays contig21068, mRNA sequence             | -1.008529592 |
| GRMZM2G01 | 9971 | DNA binding protein Putative uncharacterized protein | 1.467482969  |
| GRMZM2G02 | 0574 | Putative uncharacterized protein                     | 1.015949747  |
| GRMZM2G02 | 0814 | hypothetical protein LOC100384141                    | -1.479439747 |
| GRMZM2G02 | 0996 | hypothetical protein LOC100191809                    | 1.239770094  |
| GRMZM2G02 | 1233 | Clone 701858 mRNA sequence                           | 2.016008156  |
| GRMZM2G02 | 1498 | Putative uncharacterized protein                     | 4.140398375  |
| GRMZM2G02 | 1879 | hypothetical protein LOC100192713                    | 1.834353711  |
| GRMZM2G02 | 2175 | hypothetical protein LOC100192058                    | -1.522175236 |
| GRMZM2G02 | 2711 | C3H2C3 RING-finger protein                           | 1.06895333   |
| GRMZM2G02 | 4690 | hypothetical protein LOC100280299                    | -1.24389643  |
| GRMZM2G02 | 5231 | cellulose synthase7                                  | 3.384788805  |
| GRMZM2G02 | 7120 | protein binding protein (LOC100283571), mRNA         | -44.29352939 |
| GRMZM2G02 | 7131 | RING finger protein 5                                | -1.18942065  |
| GRMZM2G02 | 7495 | hypothetical protein LOC100280311                    | -2.973551624 |
| GRMZM2G02 | 7723 | cellulose synthase-2                                 | 2.240532032  |
| GRMZM2G02 |      | hypothetical protein LOC100304258                    | 2.034465025  |

|           |                                                             |              |
|-----------|-------------------------------------------------------------|--------------|
| 7856      |                                                             |              |
| GRMZM2G02 |                                                             |              |
| 8183      | hypothetical protein LOC100217233                           | -1.274235367 |
| GRMZM2G02 |                                                             |              |
| 8353      | hypothetical protein LOC100280232                           | 4.971364404  |
| GRMZM2G02 |                                                             |              |
| 9001      | hypothetical protein LOC100276679                           | 1.680779912  |
| GRMZM2G03 |                                                             |              |
| 0768      | hypothetical protein LOC100383801                           | 5.018791752  |
| GRMZM2G03 |                                                             |              |
| 0955      | RING zinc finger protein-like                               | 1.773208587  |
| GRMZM2G03 |                                                             |              |
| 2071      | hypothetical protein LOC100191907                           | 1.485057615  |
| GRMZM2G03 |                                                             |              |
| 2821      | hypothetical protein LOC100278355                           | 1.467482969  |
| GRMZM2G03 |                                                             |              |
| 5601      | zinc finger, C3HC4 type family protein (LOC100281133), mRNA | 1.504791858  |
| GRMZM2G03 |                                                             |              |
| 5785      | Protein binding protein Putative uncharacterized protein    | -1.802515836 |
| GRMZM2G03 |                                                             |              |
| 5821      | hypothetical protein LOC100279034                           | -3.407194569 |
| GRMZM2G03 |                                                             |              |
| 5899      | hypothetical protein LOC100276255                           | 3.06147309   |
| GRMZM2G03 |                                                             |              |
| 6697      | hypothetical protein LOC100381407                           | -1.170923204 |
| GRMZM2G03 |                                                             |              |
| 7627      | RING-H2 finger protein ATL5F                                | 10.63925152  |
| GRMZM2G03 |                                                             |              |
| 9725      | S-ribonuclease binding protein SBP1                         | -3.407194569 |
| GRMZM2G04 |                                                             |              |
| 0207      | Zinc finger, C3HC4 type family protein                      | 1.704420323  |
| GRMZM2G04 |                                                             |              |
| 0803      | ring domain containing protein                              | -1.053132867 |

|           |                                                                         |  |              |
|-----------|-------------------------------------------------------------------------|--|--------------|
| GRMZM2G04 |                                                                         |  |              |
| 1549      | Putative uncharacterized protein Zinc finger, C3HC4 type family protein |  | -2.271463046 |
| GRMZM2G04 |                                                                         |  |              |
| 1561      | BRCA1-associated protein                                                |  | 1.54338726   |
| GRMZM2G04 |                                                                         |  |              |
| 5084      | Putative RING zinc finger domain superfamily protein                    |  | -2.95290196  |
| GRMZM2G04 |                                                                         |  |              |
| 5286      | hypothetical protein LOC100194366                                       |  | -1.953458219 |
| GRMZM2G04 |                                                                         |  |              |
| 6658      | hypothetical protein LOC100193782                                       |  | 1.144813521  |
| GRMZM2G04 |                                                                         |  |              |
| 7167      | zinc ribbon 1                                                           |  | 1.56318838   |
| GRMZM2G04 |                                                                         |  |              |
| 9070      | hypothetical protein LOC100193225                                       |  | -1.362877828 |
| GRMZM2G04 |                                                                         |  |              |
| 9346      | hypothetical protein LOC100191632                                       |  | 1.388159565  |
| GRMZM2G04 |                                                                         |  |              |
| 9672      | Putative uncharacterized protein                                        |  | 2.132003558  |
| GRMZM2G05 |                                                                         |  |              |
| 0216      | zinc finger, C3HC4 type family protein                                  |  | -1.362877828 |
| GRMZM2G05 |                                                                         |  |              |
| 0774      | hypothetical protein LOC100274803                                       |  | -1.409873615 |
| GRMZM2G05 |                                                                         |  |              |
| 1101      | Putative uncharacterized protein                                        |  | 1.695195843  |
| GRMZM2G05 |                                                                         |  |              |
| 2034      | Hypothetical protein LOC100272854                                       |  | 1.109560293  |
| GRMZM2G05 |                                                                         |  |              |
| 2344      | RING-H2 finger protein ATL2B                                            |  | 1.326378837  |
| GRMZM2G05 |                                                                         |  |              |
| 2688      | ATBRCA1                                                                 |  | 2.171478176  |
| GRMZM2G05 |                                                                         |  |              |
| 3027      | hypothetical protein LOC100194362                                       |  | -1.640501089 |
| GRMZM2G05 |                                                                         |  |              |
|           | Putative RING zinc finger domain superfamily protein isoform 1          |  | 1.271818573  |

|           |                                                                                  |              |
|-----------|----------------------------------------------------------------------------------|--------------|
| 3210      |                                                                                  |              |
| GRMZM2G05 |                                                                                  |              |
| 3303      | LOC100285270                                                                     | 2.934965937  |
| GRMZM2G05 |                                                                                  |              |
| 3511      | hypothetical protein LOC100194163                                                | -1.238979843 |
| GRMZM2G05 |                                                                                  |              |
| 3707      | unknown                                                                          | 7.337414843  |
| GRMZM2G05 |                                                                                  |              |
| 3909      | Putative uncharacterized protein Zinc finger, C3HC4 type family protein ;        | 1.516399067  |
| GRMZM2G05 |                                                                                  |              |
| 5037      | ubiquitin-protein ligase/ zinc ion binding protein                               | 1.467482969  |
| GRMZM2G05 |                                                                                  |              |
| 5643      | Putative uncharacterized protein                                                 | -1.00014807  |
| GRMZM2G05 |                                                                                  |              |
| 5973      | hypothetical protein LOC100274339                                                | 2.088341148  |
| GRMZM2G05 |                                                                                  |              |
| 6270      | RING finger and CHY zinc finger domain-containing protein 1 (LOC100282790), mRNA | 1.931925717  |
| GRMZM2G05 |                                                                                  |              |
| 8450      | hypothetical protein LOC100192826                                                | -2.827971492 |
| GRMZM2G05 |                                                                                  |              |
| 9110      | Putative RING zinc finger domain superfamily protein                             | -1.362877828 |
| GRMZM2G06 |                                                                                  |              |
| 1624      | Putative uncharacterized protein SINA4 Ubiquitin ligase SINAT4                   | 1.104040925  |
| GRMZM2G06 |                                                                                  |              |
| 1663      | Putative RING zinc finger domain superfamily protein                             | -2.044316741 |
| GRMZM2G06 |                                                                                  |              |
| 1980      | Putative uncharacterized protein Zinc finger, C3HC4 type family protein          | 1.209314669  |
| GRMZM2G06 |                                                                                  |              |
| 2724      | Putative uncharacterized protein                                                 | -13.35620271 |
| GRMZM2G06 |                                                                                  |              |
| 4580      | hypothetical protein LOC100382007                                                | 1.021715293  |
| GRMZM2G06 |                                                                                  |              |
| 5893      | Hypothetical protein LOC100279516                                                | 1.59696676   |

|           |      |                                                                                    |              |
|-----------|------|------------------------------------------------------------------------------------|--------------|
| GRMZM2G06 | 6169 | hypothetical protein LOC100191553                                                  | 1.415072863  |
| GRMZM2G06 | 6171 | hypothetical protein LOC100381983                                                  | 1.971930239  |
| GRMZM2G06 | 8128 | Putative uncharacterized protein RING-H2 finger protein ATL2M                      | -2.877186525 |
| GRMZM2G06 | 8239 | Putative RING zinc finger domain superfamily protein                               | -11.58446153 |
| GRMZM2G06 | 8590 | inhibitor of apoptosis-like protein                                                | -1.168180995 |
| GRMZM2G06 | 9162 | Putative uncharacterized protein                                                   | 1.108099384  |
| GRMZM2G06 | 9215 | Zinc finger, C3HC4 type family protein                                             | 1.287054735  |
| GRMZM2G06 | 9923 | hypothetical protein LOC100383370                                                  | -3.167770086 |
| GRMZM2G06 | 9928 | unknown                                                                            | 1.619291551  |
| GRMZM2G07 | 1277 | RING zinc finger protein-like                                                      | 7.337414843  |
| GRMZM2G07 | 1602 | Putative uncharacterized protein                                                   | -1.544594871 |
| GRMZM2G07 | 1613 | PHD-finger family protein                                                          | 1.724292488  |
| GRMZM2G07 | 2462 | hypothetical protein LOC100191292                                                  | -1.40881753  |
| GRMZM2G07 | 3228 | hypothetical protein LOC100193125                                                  | -2.516082143 |
| GRMZM2G07 | 4254 | hypothetical protein LOC100381693                                                  | -1.035787149 |
| GRMZM2G07 | 5019 | Putative uncharacterized protein                                                   | 1.254461247  |
| GRMZM2G07 |      | Putative uncharacterized protein RING finger and CHY zinc finger domain-containing | 1.626498151  |



|           |                                                                 |              |
|-----------|-----------------------------------------------------------------|--------------|
| 7307      | protein 1                                                       |              |
| GRMZM2G07 |                                                                 |              |
| 7809      | hypothetical protein LOC100279782                               | 1.0723914    |
| GRMZM2G07 |                                                                 |              |
| 8526      | Putative uncharacterized protein Ring domain containing protein | -4.542926092 |
| GRMZM2G08 |                                                                 |              |
| 0079      | Putative uncharacterized protein RING-H2 finger protein ATL1Q   | 1.677123393  |
| GRMZM2G08 |                                                                 |              |
| 1060      | Zinc finger, C3HC4 type family protein                          | 1.907727859  |
| GRMZM2G08 |                                                                 |              |
| 1075      | Putative uncharacterized protein                                | 1.769611815  |
| GRMZM2G08 |                                                                 |              |
| 1350      | hypothetical protein LOC100382524                               | 1.356919183  |
| GRMZM2G08 |                                                                 |              |
| 1829      | Putative uncharacterized protein                                | -1.26233766  |
| GRMZM2G08 |                                                                 |              |
| 1912      | hypothetical protein LOC100274494                               | 2.230574112  |
| GRMZM2G08 |                                                                 |              |
| 1965      | hypothetical protein LOC100276574                               | -1.348063938 |
| GRMZM2G08 |                                                                 |              |
| 2580      | hypothetical protein LOC100191657                               | 2.934965937  |
| GRMZM2G08 |                                                                 |              |
| 3382      | unknown                                                         | -1.362877828 |
| GRMZM2G08 |                                                                 |              |
| 4819      | hypothetical protein LOC100193494                               | 1.39488118   |
| GRMZM2G08 |                                                                 |              |
| 5948      | protein binding protein                                         | 1.462687273  |
| GRMZM2G08 |                                                                 |              |
| 7787      | Uncharacterized protein                                         | 1.399543942  |
| GRMZM2G08 |                                                                 |              |
| 9466      | hypothetical protein LOC100383634                               | -1.067282445 |
| GRMZM2G09 |                                                                 |              |
| 2244      | hypothetical protein LOC100193667                               | 4.236765345  |

|           |      |                                                                                     |              |
|-----------|------|-------------------------------------------------------------------------------------|--------------|
| GRMZM2G09 | 5025 | Putative RING zinc finger domain superfamily protein                                | -4.088633483 |
| GRMZM2G09 | 5873 | protein binding protein                                                             | -4.088633483 |
| GRMZM2G09 | 6281 | Putative uncharacterized protein                                                    | -1.362877828 |
| GRMZM2G09 | 8637 | hypothetical protein LOC100191926                                                   | 1.577544191  |
| GRMZM2G09 | 9238 | hypothetical protein LOC100192691                                                   | -8.177266965 |
| GRMZM2G10 | 1852 | Ubiquitin ligase SINAT3                                                             | -1.143058823 |
| GRMZM2G10 | 2243 | unknown                                                                             | 1.238728271  |
| GRMZM2G10 | 3245 | Putative uncharacterized protein Ubiquitin-protein ligase/ zinc ion binding protein | 1.619291551  |
| GRMZM2G10 | 5460 | RING-H2 finger protein ATL3B                                                        | -4.088633483 |
| GRMZM2G10 | 5770 | unknown                                                                             | 3.660554738  |
| GRMZM2G10 | 6377 | hypothetical protein LOC100278311                                                   | -1.362877828 |
| GRMZM2G10 | 7463 | Putative uncharacterized protein                                                    | -1.54350019  |
| GRMZM2G10 | 8084 | Zinc finger, C3HC4 type family protein                                              | 1.173986375  |
| GRMZM2G10 | 8085 | RING-H2 finger protein ATL1G                                                        | 1.399227947  |
| GRMZM2G11 | 0423 | hypothetical protein LOC100279995                                                   | -4.429352939 |
| GRMZM2G11 | 1614 | Putative uncharacterized protein                                                    | -1.492675716 |
| GRMZM2G11 |      | Putative uncharacterized protein                                                    | 1.385956137  |

|           |                                                                                     |              |
|-----------|-------------------------------------------------------------------------------------|--------------|
| 3002      |                                                                                     |              |
| GRMZM2G11 |                                                                                     |              |
| 3039      | Putative uncharacterized protein Ubiquitin-protein ligase/ zinc ion binding protein | -1.265529411 |
| GRMZM2G11 |                                                                                     |              |
| 3137      | cellulose synthase 6                                                                | 2.171239825  |
| GRMZM2G11 |                                                                                     |              |
| 3295      | RING zinc finger protein-like                                                       | -1.316678579 |
| GRMZM2G11 |                                                                                     |              |
| 6574      | hypothetical protein LOC100382051                                                   | -1.007344481 |
| GRMZM2G11 |                                                                                     |              |
| 6714      | hypothetical protein LOC100193229                                                   | 2.875473384  |
| GRMZM2G11 |                                                                                     |              |
| 6952      | hypothetical protein LOC100279906                                                   | 2.534743309  |
| GRMZM2G11 |                                                                                     |              |
| 7612      | LOC100279085                                                                        | -1.240994445 |
| GRMZM2G11 |                                                                                     |              |
| 8265      | Putative uncharacterized protein                                                    | 1.822768319  |
| GRMZM2G11 |                                                                                     |              |
| 8344      | hypothetical protein LOC100381884                                                   | -1.111424354 |
| GRMZM2G11 |                                                                                     |              |
| 8385      | Putative uncharacterized protein Ubiquitin-protein ligase/ zinc ion binding protein | 1.244170343  |
| GRMZM2G11 |                                                                                     |              |
| 9930      | Putative uncharacterized protein Zinc finger, RING-type                             | -1.282403137 |
| GRMZM2G12 |                                                                                     |              |
| 0816      | RING-finger protein like                                                            | 1.178588238  |
| GRMZM2G12 |                                                                                     |              |
| 2284      | RING-H2 finger protein ATL2C                                                        | -24.5318009  |
| GRMZM2G12 |                                                                                     |              |
| 2848      | hypothetical protein LOC100217052                                                   | -12.26590045 |
| GRMZM2G12 |                                                                                     |              |
| 3212      | ubiquitin-protein ligase CIP8                                                       | -2.044316741 |
| GRMZM2G12 |                                                                                     |              |
| 3660      | HEAT/U-box domain-containing protein                                                | -1.141815799 |

|           |      |                                                          |              |
|-----------|------|----------------------------------------------------------|--------------|
| GRMZM2G12 | 3791 | RNA-binding region-containing protein 1                  | -1.26375944  |
| GRMZM2G12 | 4441 | RING finger protein 126                                  | 1.926425519  |
| GRMZM2G12 | 4701 | C-terminal zinc-finger                                   | -1.444001508 |
| GRMZM2G12 | 4915 | Putative uncharacterized protein Ubiquitin ligase SINAT3 | -1.07595618  |
| GRMZM2G12 | 5867 | ubiquitin-protein ligase/ zinc ion binding protein       | 1.467482969  |
| GRMZM2G12 | 6795 | Putative uncharacterized protein                         | -1.187022624 |
| GRMZM2G12 | 9150 | RING finger protein 5                                    | 2.81267569   |
| GRMZM2G12 | 9585 | Putative uncharacterized protein                         | 2.527331779  |
| GRMZM2G13 | 0167 | unknown                                                  | 7.337414843  |
| GRMZM2G13 | 1245 | ubiquitin-protein ligase/ zinc ion binding protein       | 1.948210148  |
| GRMZM2G13 | 1591 | RNA-binding protein                                      | 1.163504354  |
| GRMZM2G13 | 3396 | Protein binding protein Putative uncharacterized protein | -1.542368629 |
| GRMZM2G13 | 4023 | hypothetical protein LOC100217252                        | 1.712063463  |
| GRMZM2G13 | 5866 | Putative uncharacterized protein                         | 2.03817079   |
| GRMZM2G13 | 5909 | hypothetical protein LOC100304260                        | 12.54697938  |
| GRMZM2G13 | 6293 | Putative RING zinc finger domain superfamily protein     | -1.014783491 |
| GRMZM2G13 |      | protein binding protein                                  | -5.062117645 |

|           |                                                                                              |              |
|-----------|----------------------------------------------------------------------------------------------|--------------|
| 8997      |                                                                                              |              |
| GRMZM2G13 |                                                                                              |              |
| 9369      | Putative uncharacterized protein                                                             | 1.391904447  |
| GRMZM2G13 |                                                                                              |              |
| 9941      | Protein binding protein                                                                      | 1.222902474  |
| GRMZM2G14 |                                                                                              |              |
| 0160      | protein binding protein                                                                      | 1.08130324   |
| GRMZM2G14 |                                                                                              |              |
| 0651      | RING-H2 finger protein ATL1Q                                                                 | -1.168180995 |
| GRMZM2G14 |                                                                                              |              |
| 0924      | zinc finger, C3HC4 type family protein                                                       | 1.467482969  |
| GRMZM2G14 |                                                                                              |              |
| 1216      | Zinc finger, C3HC4 type family protein                                                       | -1.422133385 |
| GRMZM2G14 |                                                                                              |              |
| 1379      | hypothetical protein LOC100383409                                                            | -1.163432292 |
| GRMZM2G14 |                                                                                              |              |
| 1596      | CONSTANS interacting protein 4                                                               | -1.362877828 |
| GRMZM2G14 |                                                                                              |              |
| 1922      | Putative uncharacterized protein                                                             | -1.417392941 |
| GRMZM2G14 |                                                                                              |              |
| 3644      | unknown                                                                                      | 1.027238078  |
| GRMZM2G14 | Putative uncharacterized protein RING finger and CHY zinc finger domain-containing protein 1 | -7.229178042 |
| 4782      |                                                                                              |              |
| GRMZM2G14 |                                                                                              |              |
| 5123      | hypothetical protein LOC100194220                                                            | 18.34353711  |
| GRMZM2G14 |                                                                                              |              |
| 5374      | hypothetical protein LOC100381751                                                            | -4.088633483 |
| GRMZM2G14 |                                                                                              |              |
| 6267      | hypothetical protein LOC100273232                                                            | 1.427764769  |
| GRMZM2G14 |                                                                                              |              |
| 6354      | SINA2 Ubiquitin ligase SINAT2                                                                | -2.299856334 |
| GRMZM2G14 |                                                                                              |              |
| 6847      | RING-H2 finger protein ATL1R                                                                 | -1.362877828 |

|           |                                                                                     |  |              |
|-----------|-------------------------------------------------------------------------------------|--|--------------|
| GRMZM2G14 |                                                                                     |  |              |
| 7809      | LOC100285109                                                                        |  | -2.385036198 |
| GRMZM2G14 |                                                                                     |  |              |
| 8249      | hypothetical protein LOC100276243                                                   |  | 1.136782581  |
| GRMZM2G14 |                                                                                     |  |              |
| 8908      | Putative uncharacterized protein Ubiquitin-protein ligase/ zinc ion binding protein |  | 2.678156418  |
| GRMZM2G14 |                                                                                     |  |              |
| 9028      | Putative uncharacterized protein RING finger protein 5                              |  | -1.552166415 |
| GRMZM2G15 |                                                                                     |  |              |
| 1576      | CONSTANS interacting protein 4                                                      |  | 1.031391332  |
| GRMZM2G15 |                                                                                     |  |              |
| 1616      | hypothetical protein LOC100193862                                                   |  | -1.417392941 |
| GRMZM2G15 |                                                                                     |  |              |
| 2408      | Ubiquitin-protein ligase/ zinc ion binding protein                                  |  | 3.081714234  |
| GRMZM2G15 |                                                                                     |  |              |
| 2461      | RING finger protein 5                                                               |  | -1.703597284 |
| GRMZM2G15 |                                                                                     |  |              |
| 3250      | Putative uncharacterized protein                                                    |  | 1.410159415  |
| GRMZM2G15 |                                                                                     |  |              |
| 3611      | hypothetical protein LOC100383096                                                   |  | 1.584881606  |
| GRMZM2G15 |                                                                                     |  |              |
| 4484      | Zinc finger, C3HC4 type family protein                                              |  | -1.362877828 |
| GRMZM2G15 |                                                                                     |  |              |
| 6415      | Putative uncharacterized protein                                                    |  | 1.037720099  |
| GRMZM2G15 |                                                                                     |  |              |
| 7246      | Hypothetical protein LOC100191157                                                   |  | -1.362877828 |
| GRMZM2G15 |                                                                                     |  |              |
| 7855      | Putative uncharacterized protein                                                    |  | 9.171768553  |
| GRMZM2G15 |                                                                                     |  |              |
| 7925      | Putative uncharacterized protein                                                    |  | -1.039763935 |
| GRMZM2G16 |                                                                                     |  |              |
| 0966      | hypothetical protein LOC100192050                                                   |  | -2.725755655 |
| GRMZM2G16 | RUBISCO activase1                                                                   |  | 1.359016836  |

|           |                                                                         |              |
|-----------|-------------------------------------------------------------------------|--------------|
| 2184      |                                                                         |              |
| GRMZM2G16 |                                                                         |              |
| 2356      | anaphase-promoting complex subunit 11                                   | -1.58093828  |
| GRMZM2G16 |                                                                         |              |
| 2949      | RING zinc finger protein-like                                           | -1.309431638 |
| GRMZM2G16 |                                                                         |              |
| 4358      | Putative uncharacterized protein RHC1A                                  | 1.354599663  |
| GRMZM2G16 |                                                                         |              |
| 4426      | hypothetical protein LOC100280415                                       | -4.391495222 |
| GRMZM2G16 |                                                                         |              |
| 5044      | unknown                                                                 | -1.817170437 |
| GRMZM2G16 |                                                                         |              |
| 5063      | inhibitor of apoptosis-like protein                                     | -1.192518099 |
| GRMZM2G16 |                                                                         |              |
| 8200      | hypothetical protein LOC100382173                                       | -1.443047112 |
| GRMZM2G16 |                                                                         |              |
| 8690      | Zinc finger, C3HC4 type family protein                                  | -2.521323981 |
| GRMZM2G16 |                                                                         |              |
| 8707      | Putative uncharacterized protein Zinc finger, C3HC4 type family protein | -1.259368119 |
| GRMZM2G16 |                                                                         |              |
| 9449      | hypothetical protein LOC100192025                                       | -1.453736349 |
| GRMZM2G16 |                                                                         |              |
| 9645      | hypothetical protein LOC100279610                                       | 1.039467103  |
| GRMZM2G16 |                                                                         |              |
| 9994      | hypothetical protein LOC100273064                                       | 4.769319648  |
| GRMZM2G17 |                                                                         |              |
| 0137      | hypothetical protein LOC100193852                                       | 1.903761689  |
| GRMZM2G17 |                                                                         |              |
| 0434      | hypothetical protein LOC100273142                                       | -1.061982723 |
| GRMZM2G17 |                                                                         |              |
| 1232      | Putative uncharacterized protein                                        | 1.354599663  |
| GRMZM2G17 |                                                                         |              |
| 1277      | Putative uncharacterized protein                                        | -1.362877828 |

|           |      |                                                      |              |
|-----------|------|------------------------------------------------------|--------------|
| GRMZM2G17 | 1561 | unknown                                              | 1.467482969  |
| GRMZM2G17 | 1967 | Putative uncharacterized protein RNA-binding protein | 1.499384772  |
| GRMZM2G17 | 4926 | Putative uncharacterized protein                     | -1.327706787 |
| GRMZM2G17 | 5661 | hypothetical protein LOC541975                       | -1.342536367 |
| GRMZM2G17 | 6028 | RHC1A                                                | 1.228590392  |
| GRMZM2G17 | 7631 | cellulose synthase8                                  | 2.538278845  |
| GRMZM2G17 | 8522 | Putative uncharacterized protein                     | 3.668707421  |
| GRMZM2G18 | 0195 | Putative uncharacterized protein                     | 1.03343871   |
| GRMZM2G18 | 1519 | LOC100283384                                         | 1.444906307  |
| GRMZM2G30 | 0589 | hypothetical protein LOC100272564                    | 1.400779197  |
| GRMZM2G30 | 5264 | hypothetical protein LOC100383341                    | -1.362877828 |
| GRMZM2G30 | 6079 | hypothetical protein LOC100191396                    | -1.226590045 |
| GRMZM2G30 | 7823 | Uncharacterized protein                              | -1.748038953 |
| GRMZM2G30 | 9063 | Ubiquitin ligase SINAT3                              | 1.65091834   |
| GRMZM2G30 | 9568 | zinc ion binding                                     | 3.144606361  |
| GRMZM2G31 | 0283 | hypothetical protein LOC100280438                    | 1.847941516  |
| GRMZM2G31 |      | ring finger protein                                  | -1.362877828 |



|           |                                                                         |              |
|-----------|-------------------------------------------------------------------------|--------------|
| 2078      |                                                                         |              |
| GRMZM2G31 |                                                                         |              |
| 2712      | hypothetical protein LOC100279071                                       | 1.111729522  |
| GRMZM2G31 |                                                                         |              |
| 5072      | Putative uncharacterized protein                                        | 7.484163139  |
| GRMZM2G31 |                                                                         |              |
| 8220      | hypothetical protein LOC100276223                                       | -1.362877828 |
| GRMZM2G31 |                                                                         |              |
| 8408      | RING zinc finger protein-like                                           | -2.385036198 |
| GRMZM2G32 |                                                                         |              |
| 0399      | hypothetical protein LOC100382497                                       | 1.030232941  |
| GRMZM2G32 |                                                                         |              |
| 4111      | RING-H2 finger protein ATL5H                                            | 3.668707421  |
| GRMZM2G32 |                                                                         |              |
| 4781      | Putative SNF2-domain/RING finger domain/helicase domain protein         | -1.196673214 |
| GRMZM2G33 |                                                                         |              |
| 0684      | unknown                                                                 | -1.362877828 |
| GRMZM2G33 |                                                                         |              |
| 6761      | Putative uncharacterized protein Zinc finger, C3HC4 type family protein | 1.271818573  |
| GRMZM2G33 |                                                                         |              |
| 9151      | Putative RING finger U-box domain family protein                        | 1.827431621  |
| GRMZM2G34 |                                                                         |              |
| 0444      | Putative RING zinc finger domain superfamily protein                    | -34.07194569 |
| GRMZM2G34 |                                                                         |              |
| 1271      | hypothetical protein LOC100274688                                       | 1.156529328  |
| GRMZM2G34 |                                                                         |              |
| 2039      | unknown                                                                 | 1.313011077  |
| GRMZM2G34 |                                                                         |              |
| 3972      | hypothetical protein LOC100217033                                       | -2.862043438 |
| GRMZM2G34 |                                                                         |              |
| 4212      | hypothetical protein LOC100193154                                       | -1.121232823 |
| GRMZM2G34 |                                                                         |              |
| 5544      | copine-1                                                                | 1.691336303  |

|           |                                                      |  |              |
|-----------|------------------------------------------------------|--|--------------|
| GRMZM2G35 |                                                      |  |              |
| 2891      | unknown                                              |  | -1.898294117 |
| GRMZM2G35 |                                                      |  |              |
| 3091      | unknown                                              |  | 4.769319648  |
| GRMZM2G35 |                                                      |  |              |
| 5846      | unknown                                              |  | -1.362877828 |
| GRMZM2G35 |                                                      |  |              |
| 6895      | RING-H2 finger protein ATL2M                         |  | 1.467482969  |
| GRMZM2G35 |                                                      |  |              |
| 9505      | Putative uncharacterized protein                     |  | 1.579139281  |
| GRMZM2G36 |                                                      |  |              |
| 1074      | Putative uncharacterized protein RING-box protein 1a |  | 1.100612226  |
| GRMZM2G36 |                                                      |  |              |
| 3253      | hypothetical protein LOC100193628                    |  | 2.934965937  |
| GRMZM2G36 |                                                      |  |              |
| 4612      | Putative RING zinc finger domain superfamily protein |  | -2.149153497 |
| GRMZM2G36 |                                                      |  |              |
| 5888      | RING/FYVE/PHD-type zinc finger family protein        |  | 1.970231763  |
| GRMZM2G37 |                                                      |  |              |
| 5153      | hypothetical protein LOC100191688                    |  | -2.725755655 |
| GRMZM2G38 |                                                      |  |              |
| 1386      | RNA polymerase T phage-like 1                        |  | 1.584214568  |
| GRMZM2G38 |                                                      |  |              |
| 3833      | hypothetical protein LOC100383546                    |  | -1.567309502 |
| GRMZM2G38 |                                                      |  |              |
| 6113      | unknown                                              |  | -2.044316741 |
| GRMZM2G39 |                                                      |  |              |
| 1413      | Uncharacterized protein                              |  | 1.033160655  |
| GRMZM2G39 |                                                      |  |              |
| 2320      | hypothetical protein LOC100273800                    |  | 1.305811116  |
| GRMZM2G39 |                                                      |  |              |
| 3349      | protein binding protein                              |  | -1.52807514  |
| GRMZM2G39 |                                                      |  |              |
|           | hypothetical protein LOC100279601                    |  | -1.265529411 |

|           |                                                          |              |
|-----------|----------------------------------------------------------|--------------|
| 9901      |                                                          |              |
| GRMZM2G40 |                                                          |              |
| 0238      | Putative uncharacterized protein                         | 1.989521992  |
| GRMZM2G40 |                                                          |              |
| 0268      | RING finger protein 5                                    | -1.453736349 |
| GRMZM2G40 |                                                          |              |
| 1436      | protein binding protein                                  | 2.494721046  |
| GRMZM2G40 |                                                          |              |
| 2341      | hypothetical protein LOC100275703                        | 1.136968786  |
| GRMZM2G40 |                                                          |              |
| 9627      | hypothetical protein LOC100192498                        | -1.413354784 |
| GRMZM2G41 |                                                          |              |
| 5012      | hypothetical protein LOC100191882                        | 1.079344357  |
| GRMZM2G41 |                                                          |              |
| 6216      | hypothetical protein LOC100384078                        | -4.088633483 |
| GRMZM2G41 |                                                          |              |
| 7089      | unknown                                                  | 2.372009109  |
| GRMZM2G41 |                                                          |              |
| 7125      | Protein binding protein Putative uncharacterized protein | -1.090302262 |
| GRMZM2G42 |                                                          |              |
| 3956      | Putative uncharacterized protein                         | 2.288904253  |
| GRMZM2G42 |                                                          |              |
| 4582      | Uncharacterized protein                                  | 1.338398819  |
| GRMZM2G42 |                                                          |              |
| 6613      | Hypothetical protein LOC100384773                        | -1.362877828 |
| GRMZM2G42 |                                                          |              |
| 8179      | RING-H2 finger protein ATL2K                             | -5.45151131  |
| GRMZM2G43 |                                                          |              |
| 3333      | hypothetical protein LOC100274776                        | -1.06143133  |
| GRMZM2G44 |                                                          |              |
| 0259      | Hypothetical protein LOC100384204                        | -1.147686592 |
| GRMZM2G44 |                                                          |              |
| 5905      | cellulose synthase10                                     | 2.383192341  |

|                           |           |                                                      |              |
|---------------------------|-----------|------------------------------------------------------|--------------|
|                           | GRMZM2G44 |                                                      |              |
|                           | 9355      | hypothetical protein LOC100216734                    | 1.473400239  |
|                           | GRMZM2G44 |                                                      |              |
|                           | 9875      | RING-H2 finger protein ATL2A                         | -2.45318009  |
|                           | GRMZM2G45 |                                                      |              |
|                           | 6241      | hypothetical protein LOC100383358                    | 4.383635021  |
|                           | GRMZM2G46 |                                                      |              |
|                           | 1447      | hypothetical protein LOC100384551                    | 1.781943605  |
|                           | GRMZM2G46 |                                                      |              |
|                           | 4976      | hypothetical protein LOC100384168                    | 1.26366589   |
|                           | GRMZM2G46 |                                                      |              |
|                           | 7187      | hypothetical protein LOC100192844                    | -5.45151131  |
|                           | GRMZM2G46 |                                                      |              |
|                           | 8260      | Putative uncharacterized protein                     | -2.611654256 |
|                           | GRMZM2G47 |                                                      |              |
|                           | 7205      | Chaperone protein dnaJ 11                            | -4.936407879 |
|                           | GRMZM2G47 |                                                      |              |
|                           | 8553      | Ring-H2 zinc finger protein                          | 1.027238078  |
|                           | GRMZM2G48 |                                                      |              |
|                           | 0106      | hypothetical protein LOC100277663                    | -4.088633483 |
|                           | GRMZM2G48 |                                                      |              |
|                           | 2046      | RING-H2 finger protein ATL2M                         | 1.956643958  |
|                           | GRMZM2G56 |                                                      |              |
|                           | 7897      | Putative RING zinc finger domain superfamily protein | 1.375765283  |
|                           | GRMZM2G70 |                                                      |              |
|                           | 4032      | Putative zinc-finger protein Fragment                | -1.382773854 |
|                           | GRMZM2G02 |                                                      |              |
| E3 ubiquitin ligases_HECT | 1299      | hypothetical protein LOC100304346                    | 1.116645138  |
|                           | GRMZM2G03 |                                                      |              |
|                           | 4622      | Putative uncharacterized protein                     | -1.120173557 |
|                           | GRMZM2G04 |                                                      |              |
|                           | 9141      | hypothetical protein LOC100382342                    | 1.403226318  |
|                           | GRMZM2G08 |                                                      |              |
|                           |           | Putative uncharacterized protein                     | 1.441737653  |

|                         |           |                                                           |              |
|-------------------------|-----------|-----------------------------------------------------------|--------------|
|                         | 0439      |                                                           |              |
|                         | GRMZM2G18 |                                                           |              |
|                         | 1378      | hypothetical protein LOC100279774                         | 1.279344126  |
|                         | GRMZM2G33 |                                                           |              |
|                         | 1368      | hypothetical protein LOC100384278                         | 1.435845691  |
|                         | GRMZM2G37 |                                                           |              |
|                         | 4574      | Putative hect E3 ubiquitin ligase Fragment                | -1.039025671 |
|                         | GRMZM2G41 |                                                           |              |
|                         | 1536      | unknown                                                   | 1.21790785   |
|                         | GRMZM2G46 |                                                           |              |
|                         | 1948      | ubiquitin-protein ligase 7                                | 1.778525554  |
|                         | GRMZM2G00 |                                                           |              |
| E3 ubiquitin ligases_BT | 0261      | voltage-gated potassium channel complex                   | -3.180048264 |
|                         | GRMZM2G00 |                                                           |              |
|                         | 0623      | Elongin C                                                 | 3.668707421  |
|                         | GRMZM2G00 |                                                           |              |
|                         | 0909      | hypothetical protein LOC100191308                         | 1.467482969  |
|                         | GRMZM2G00 |                                                           |              |
|                         | 0936      | hypothetical protein LOC100192477                         | 3.104674852  |
|                         | GRMZM2G00 |                                                           |              |
|                         | 6424      | Hypothetical protein LOC100276863                         | -1.946968325 |
|                         | GRMZM2G00 |                                                           |              |
|                         | 9724      | Putative uncharacterized protein Speckle-type POZ protein | 1.645359692  |
|                         | GRMZM2G01 |                                                           |              |
|                         | 7404      | Putative uncharacterized protein                          | 2.043994135  |
|                         | GRMZM2G01 |                                                           |              |
|                         | 7486      | Putative uncharacterized protein                          | 2.445804948  |
|                         | GRMZM2G02 |                                                           |              |
|                         | 0156      | Protein binding protein Putative uncharacterized protein  | -13.62877828 |
|                         | GRMZM2G02 |                                                           |              |
|                         | 3346      | hypothetical protein LOC100279937                         | 2.384659824  |
|                         | GRMZM2G02 |                                                           |              |
|                         | 7688      | hypothetical protein LOC100275864                         | 1.467482969  |

|           |                                         |  |              |
|-----------|-----------------------------------------|--|--------------|
| GRMZM2G02 |                                         |  |              |
| 9307      | Putative uncharacterized protein        |  | 1.956643958  |
| GRMZM2G03 |                                         |  |              |
| 3267      | hypothetical protein LOC100191409       |  | -12.26590045 |
| GRMZM2G03 |                                         |  |              |
| 8691      | GAMYB-binding protein                   |  | 1.400779197  |
| GRMZM2G03 |                                         |  |              |
| 9280      | Ethylene-overproduction protein 1       |  | 2.614787835  |
| GRMZM2G04 |                                         |  |              |
| 0115      | Putative uncharacterized protein        |  | 7.704285585  |
| GRMZM2G04 |                                         |  |              |
| 5257      | voltage-gated potassium channel complex |  | 1.366277247  |
| GRMZM2G04 |                                         |  |              |
| 8281      | Putative uncharacterized protein        |  | 2.132436189  |
| GRMZM2G05 |                                         |  |              |
| 5785      | cellulose synthase catalytic subunit 11 |  | -1.698929895 |
| GRMZM2G05 |                                         |  |              |
| 8531      | hypothetical protein LOC100273151       |  | 2.078934205  |
| GRMZM2G05 |                                         |  |              |
| 9282      | Elongin C                               |  | -1.424268721 |
| GRMZM2G05 |                                         |  |              |
| 9865      | hypothetical protein LOC100382519       |  | 3.250983309  |
| GRMZM2G06 |                                         |  |              |
| 0765      | Hypothetical protein LOC100381943       |  | -1.639712386 |
| GRMZM2G06 |                                         |  |              |
| 7053      | Hypothetical protein LOC100279255       |  | -6.814389138 |
| GRMZM2G07 |                                         |  |              |
| 4323      | LOC100284563                            |  | -1.014909021 |
| GRMZM2G07 |                                         |  |              |
| 6450      | Regulatory protein NPR1                 |  | 1.169627515  |
| GRMZM2G07 |                                         |  |              |
| 7197      | Regulatory protein NPR1                 |  | 2.934965937  |
| GRMZM2G08 | unknown                                 |  | -1.934407239 |

|           |                                                           |              |
|-----------|-----------------------------------------------------------|--------------|
| 5189      |                                                           |              |
| GRMZM2G08 |                                                           |              |
| 8086      | Putative uncharacterized protein Speckle-type POZ protein | 5.869931874  |
| GRMZM2G09 |                                                           |              |
| 5510      | LOC100282480                                              | 1.712063463  |
| GRMZM2G09 |                                                           |              |
| 8227      | hypothetical protein LOC100279213                         | -1.081003309 |
| GRMZM2G10 |                                                           |              |
| 0946      | Uncharacterized protein                                   | 1.058816825  |
| GRMZM2G11 |                                                           |              |
| 0531      | Putative uncharacterized protein                          | 1.035870331  |
| GRMZM2G11 |                                                           |              |
| 5162      | hypothetical protein LOC100384298                         | 1.981102008  |
| GRMZM2G11 |                                                           |              |
| 8082      | hypothetical protein LOC100279911                         | -1.154804877 |
| GRMZM2G12 |                                                           |              |
| 8485      | hypothetical protein LOC100194212                         | 2.868262166  |
| GRMZM2G13 |                                                           |              |
| 0505      | BTB/POZ domain containing protein                         | 2.201224453  |
| GRMZM2G14 |                                                           |              |
| 2825      | Putative uncharacterized protein                          | 1.971031046  |
| GRMZM2G14 |                                                           |              |
| 3782      | LOC100283633                                              | 1.712063463  |
| GRMZM2G14 |                                                           |              |
| 8213      | hypothetical protein LOC100191618                         | -1.166173811 |
| GRMZM2G15 |                                                           |              |
| 4149      | hypothetical protein LOC100280048                         | -1.409873615 |
| GRMZM2G15 |                                                           |              |
| 4437      | hypothetical protein LOC100193156                         | 1.801001825  |
| GRMZM2G15 |                                                           |              |
| 7379      | voltage-gated potassium channel complex                   | 1.124029508  |
| GRMZM2G15 |                                                           |              |
| 9161      | hypothetical protein LOC100191465                         | -1.362877828 |

|           |                                                                         |  |              |
|-----------|-------------------------------------------------------------------------|--|--------------|
| GRMZM2G16 |                                                                         |  |              |
| 2640      | hypothetical protein LOC100383502                                       |  | -1.61841742  |
| GRMZM2G16 |                                                                         |  |              |
| 3671      | hypothetical protein LOC100217158                                       |  | 1.315674386  |
| GRMZM2G16 |                                                                         |  |              |
| 4669      | Hypothetical protein LOC100274902                                       |  | 1.510644232  |
| GRMZM2G16 |                                                                         |  |              |
| 9782      | hypothetical protein LOC100191918                                       |  | -19.08028959 |
| GRMZM2G17 |                                                                         |  |              |
| 2210      | hypothetical protein LOC100272403                                       |  | -1.101395454 |
| GRMZM2G17 |                                                                         |  |              |
| 2376      | hypothetical protein LOC100274431                                       |  | -1.530903861 |
| GRMZM2G17 |                                                                         |  |              |
| 2506      | hypothetical protein LOC100280174                                       |  | 5.13619039   |
| GRMZM2G30 |                                                                         |  |              |
| 1803      | hypothetical protein LOC100192849                                       |  | -1.47645098  |
| GRMZM2G32 |                                                                         |  |              |
| 0703      | Putative uncharacterized protein TD and POZ domain-containing protein 1 |  | 1.138564372  |
| GRMZM2G35 |                                                                         |  |              |
| 0711      | hypothetical protein LOC100279559                                       |  | 1.32234729   |
| GRMZM2G35 |                                                                         |  |              |
| 3024      | unknown                                                                 |  | 3.668707421  |
| GRMZM2G39 |                                                                         |  |              |
| 7948      | unknown                                                                 |  | 1.362662757  |
| GRMZM2G41 |                                                                         |  |              |
| 6184      | unknown                                                                 |  | -2.180604524 |
| GRMZM2G41 |                                                                         |  |              |
| 6964      | seven-transmembrane-domain protein 1                                    |  | -9.540144793 |
| GRMZM2G41 |                                                                         |  |              |
| 8031      | unknown                                                                 |  | 2.017789082  |
| GRMZM2G43 |                                                                         |  |              |
| 6511      | hypothetical protein LOC100278588                                       |  | 1.862574537  |
| GRMZM2G47 | Putative uncharacterized protein                                        |  | -1.362877828 |



|                            |                                                                  |                                          |              |
|----------------------------|------------------------------------------------------------------|------------------------------------------|--------------|
|                            | 6637                                                             |                                          |              |
| E3 ubiquitin ligases_F Box | AC149829.2_F                                                     |                                          |              |
|                            | G006                                                             | Uncharacterized protein                  | 1.859367625  |
|                            | AC190750.2_F                                                     |                                          |              |
|                            | G014                                                             | F-box domain containing protein          | -1.06351738  |
|                            | AC194341.4_F                                                     |                                          |              |
|                            | G004                                                             | hypothetical protein LOC100279285        | -1.233079939 |
|                            | AC204868.3_F                                                     |                                          |              |
|                            | G004                                                             | Putative F-box containing family protein | -1.362877828 |
|                            | AC207342.3_F                                                     |                                          |              |
|                            | G007                                                             | F-box domain containing protein          | 1.809895661  |
|                            | AC214635.3_F                                                     |                                          |              |
|                            | G002                                                             | LOC100281539                             | 1.086501813  |
|                            | AC233942.1_F                                                     |                                          |              |
|                            | G001                                                             | Hypothetical protein LOC100382855        | -1.779312719 |
|                            | GRMZM2G00                                                        |                                          |              |
|                            | 1272                                                             | Putative uncharacterized protein         | 1.427460706  |
|                            | GRMZM2G00                                                        |                                          |              |
|                            | 1639                                                             | hypothetical protein LOC100193825        | -2.131680705 |
| GRMZM2G00                  |                                                                  |                                          |              |
| 2427                       | Ubiquitin-protein ligase                                         | -1.111821386                             |              |
| GRMZM2G00                  |                                                                  |                                          |              |
| 3663                       | Kelch motif family protein Putative uncharacterized protein      | -1.250860472                             |              |
| GRMZM2G00                  |                                                                  |                                          |              |
| 4592                       | F-box domain containing protein Putative uncharacterized protein | 1.281464001                              |              |
| GRMZM2G00                  |                                                                  |                                          |              |
| 5486                       | F-box domain containing protein Putative uncharacterized protein | 1.801001825                              |              |
| GRMZM2G00                  |                                                                  |                                          |              |
| 5622                       | Putative uncharacterized protein                                 | 2.379101176                              |              |
| GRMZM2G00                  |                                                                  |                                          |              |
| 9021                       | unknown                                                          | 2.503353299                              |              |
| GRMZM2G00                  |                                                                  |                                          |              |
| 9717                       | Uncharacterized protein                                          | 1.188661205                              |              |

|           |                                                             |  |              |
|-----------|-------------------------------------------------------------|--|--------------|
| GRMZM2G01 |                                                             |  |              |
| 0551      | Putative uncharacterized protein                            |  | 1.007096155  |
| GRMZM2G01 |                                                             |  |              |
| 1055      | unknown                                                     |  | -64.05525789 |
| GRMZM2G01 |                                                             |  |              |
| 1627      | Putative uncharacterized protein                            |  | -1.566772936 |
| GRMZM2G01 |                                                             |  |              |
| 2393      | F-box protein interaction domain containing protein         |  | 2.971653011  |
| GRMZM2G01 |                                                             |  |              |
| 2821      | Uncharacterized protein                                     |  | 2.568095195  |
| GRMZM2G01 |                                                             |  |              |
| 6878      | hypothetical protein LOC100193490                           |  | -1.749026545 |
| GRMZM2G01 |                                                             |  |              |
| 7933      | Putative uncharacterized protein                            |  | 1.99314851   |
| GRMZM2G02 |                                                             |  |              |
| 0366      | Putative uncharacterized protein                            |  | 1.10780577   |
| GRMZM2G02 |                                                             |  |              |
| 0594      | F-box domain containing protein                             |  | 1.808148658  |
| GRMZM2G02 |                                                             |  |              |
| 4806      | Putative uncharacterized protein                            |  | -1.941068421 |
| GRMZM2G02 |                                                             |  |              |
| 5783      | hypothetical protein LOC100384515                           |  | -6.294017603 |
| GRMZM2G02 |                                                             |  |              |
| 6229      | hypothetical protein LOC100216784                           |  | 4.402448906  |
| GRMZM2G02 |                                                             |  |              |
| 8014      | hypothetical protein LOC100273165                           |  | -1.908028959 |
| GRMZM2G02 |                                                             |  |              |
| 8796      | Uncharacterized protein                                     |  | 1.100612226  |
| GRMZM2G02 |                                                             |  |              |
| 9039      | Kelch motif family protein Putative uncharacterized protein |  | 3.815455718  |
| GRMZM2G02 |                                                             |  |              |
| 9478      | F-box domain containing protein                             |  | 1.058184998  |
| GRMZM2G03 |                                                             |  |              |
|           | hypothetical protein LOC100192018                           |  | -1.362877828 |

|           |                                                                  |              |
|-----------|------------------------------------------------------------------|--------------|
| 0823      |                                                                  |              |
| GRMZM2G03 |                                                                  |              |
| 3027      | hypothetical protein LOC100383592                                | 1.192329912  |
| GRMZM2G03 |                                                                  |              |
| 4748      | unknown                                                          | 1.033160655  |
| GRMZM2G03 |                                                                  |              |
| 5243      | kelch motif family protein                                       | -1.21019027  |
| GRMZM2G03 |                                                                  |              |
| 7882      | hypothetical protein LOC100277619                                | 3.616297315  |
| GRMZM2G03 |                                                                  |              |
| 8839      | hypothetical protein LOC100383249                                | -3.407194569 |
| GRMZM2G04 |                                                                  |              |
| 0182      | Hypothetical protein LOC100384416                                | 1.438133309  |
| GRMZM2G04 |                                                                  |              |
| 1048      | LOC100285522                                                     | 1.614231265  |
| GRMZM2G04 |                                                                  |              |
| 1959      | hypothetical protein LOC100382458                                | -1.221890466 |
| GRMZM2G04 |                                                                  |              |
| 2752      | unknown                                                          | -1.060016088 |
| GRMZM2G04 |                                                                  |              |
| 4388      | hypothetical protein LOC100274439                                | -3.35359825  |
| GRMZM2G04 |                                                                  |              |
| 5820      | hypothetical protein LOC100279556                                | 1.002183491  |
| GRMZM2G04 |                                                                  |              |
| 6816      | hypothetical protein LOC100193930                                | 4.668726057  |
| GRMZM2G04 |                                                                  |              |
| 7777      | F-box domain containing protein Putative uncharacterized protein | 1.222902474  |
| GRMZM2G04 |                                                                  |              |
| 8661      | Putative uncharacterized protein                                 | 1.31025265   |
| GRMZM2G04 |                                                                  |              |
| 8665      | RNI-like superfamily protein                                     | -1.238979843 |
| GRMZM2G04 |                                                                  |              |
| 9364      | hypothetical protein LOC100383281                                | 1.260530242  |

|           |                                   |  |              |
|-----------|-----------------------------------|--|--------------|
| GRMZM2G05 |                                   |  |              |
| 1090      | hypothetical protein LOC100279741 |  | 1.767649939  |
| GRMZM2G05 |                                   |  |              |
| 2268      | F-box domain containing protein   |  | 1.467482969  |
| GRMZM2G05 |                                   |  |              |
| 4032      | F-box protein                     |  | -2.725755655 |
| GRMZM2G05 |                                   |  |              |
| 9799      | Ethylene-responsive protein       |  | 2.515685089  |
| GRMZM2G06 |                                   |  |              |
| 0257      | ATPP2-A13                         |  | -1.035787149 |
| GRMZM2G06 |                                   |  |              |
| 0276      | hypothetical protein LOC100382494 |  | 1.259820284  |
| GRMZM2G06 |                                   |  |              |
| 4954      | Uncharacterized protein           |  | 1.616867462  |
| GRMZM2G06 |                                   |  |              |
| 5970      | unknown                           |  | 1.467482969  |
| GRMZM2G06 |                                   |  |              |
| 7460      | Hypothetical protein LOC100381788 |  | -1.121355175 |
| GRMZM2G06 |                                   |  |              |
| 7626      | hypothetical protein LOC100192470 |  | -4.088633483 |
| GRMZM2G06 |                                   |  |              |
| 8586      | hypothetical protein LOC100193706 |  | 1.602251813  |
| GRMZM2G06 |                                   |  |              |
| 9649      | F-box family member               |  | -1.128210122 |
| GRMZM2G07 |                                   |  |              |
| 1113      | hypothetical protein LOC100192671 |  | 1.510644232  |
| GRMZM2G07 |                                   |  |              |
| 1705      | cyclin-like F-box                 |  | 7.337414843  |
| GRMZM2G07 |                                   |  |              |
| 1997      | Putative uncharacterized protein  |  | 1.605059497  |
| GRMZM2G07 |                                   |  |              |
| 2028      | hypothetical protein LOC100216622 |  | 2.641469343  |
| GRMZM2G07 |                                   |  |              |
|           | hypothetical protein LOC100274878 |  | 4.402448906  |

|           |                                                                            |              |
|-----------|----------------------------------------------------------------------------|--------------|
| 2586      |                                                                            |              |
| GRMZM2G07 |                                                                            |              |
| 4245      | hypothetical protein LOC100277288                                          | -2.306408631 |
| GRMZM2G07 |                                                                            |              |
| 8198      | Putative uncharacterized protein Transferase, transferring glycosyl groups | 1.448669084  |
| GRMZM2G07 |                                                                            |              |
| 9031      | unknown                                                                    | 1.164203155  |
| GRMZM2G08 |                                                                            |              |
| 1032      | unknown                                                                    | 2.934965937  |
| GRMZM2G08 |                                                                            |              |
| 1172      | hypothetical protein LOC100275642                                          | 1.222902474  |
| GRMZM2G08 |                                                                            |              |
| 2346      | hypothetical protein LOC100276415                                          | 2.934965937  |
| GRMZM2G08 |                                                                            |              |
| 2853      | hypothetical protein LOC100381683                                          | 1.177043631  |
| GRMZM2G08 |                                                                            |              |
| 2964      | F-box domain containing protein                                            | -1.362877828 |
| GRMZM2G08 |                                                                            |              |
| 4035      | F-box domain containing protein                                            | 1.065672156  |
| GRMZM2G08 |                                                                            |              |
| 8482      | ATPP2-A13                                                                  | -13.62877828 |
| GRMZM2G09 |                                                                            |              |
| 0104      | Putative uncharacterized protein                                           | 1.027238078  |
| GRMZM2G09 |                                                                            |              |
| 1293      | hypothetical protein LOC100384571                                          | 1.254461247  |
| GRMZM2G10 |                                                                            |              |
| 0121      | unknown                                                                    | 1.076154177  |
| GRMZM2G10 |                                                                            |              |
| 1036      | F-box domain containing protein                                            | 3.179546432  |
| GRMZM2G10 |                                                                            |              |
| 1060      | Putative uncharacterized protein                                           | -1.253847601 |
| GRMZM2G10 |                                                                            |              |
| 1545      | hypothetical protein LOC100193191                                          | 3.668707421  |

|           |      |                                                                  |              |
|-----------|------|------------------------------------------------------------------|--------------|
| GRMZM2G10 | 2189 | kelch motif family protein                                       | -1.312400871 |
| GRMZM2G10 | 4882 | Hypothetical protein LOC100194140                                | 1.956643958  |
| GRMZM2G10 | 6363 | hypothetical protein LOC100279726                                | -3.469143561 |
| GRMZM2G10 | 7945 | hypothetical protein LOC100383277                                | -1.066600039 |
| GRMZM2G10 | 8228 | LOC100281288                                                     | 1.070039665  |
| GRMZM2G10 | 9140 | ubiquitin-protein ligase                                         | -2.33636199  |
| GRMZM2G11 | 0057 | unknown                                                          | -1.55757466  |
| GRMZM2G11 | 0330 | unknown                                                          | -1.362877828 |
| GRMZM2G11 | 3244 | hypothetical protein LOC100276321                                | 2.040718503  |
| GRMZM2G11 | 5701 | hypothetical protein LOC100273859                                | 4.6470294    |
| GRMZM2G11 | 5998 | hypothetical protein LOC100194199                                | 1.699190806  |
| GRMZM2G11 | 6603 | F-box domain containing protein                                  | -2.385036198 |
| GRMZM2G11 | 7633 | Putative uncharacterized protein                                 | -1.267237278 |
| GRMZM2G11 | 8109 | hypothetical protein LOC100194002                                | 26.41469343  |
| GRMZM2G11 | 9650 | F-box domain containing protein Putative uncharacterized protein | 1.731629903  |
| GRMZM2G11 | 9932 | Uncharacterized protein                                          | -2.141665158 |
| GRMZM2G12 |      | F-box family protein Fragment                                    | 4.483975737  |

|           |                                                     |  |              |
|-----------|-----------------------------------------------------|--|--------------|
| 0408      |                                                     |  |              |
| GRMZM2G12 |                                                     |  |              |
| 3128      | lysM domain containing protein                      |  | -1.734571781 |
| GRMZM2G12 |                                                     |  |              |
| 5411      | hypothetical protein LOC100382859                   |  | -2.964259275 |
| GRMZM2G12 |                                                     |  |              |
| 6920      | hypothetical protein LOC100384433                   |  | -1.362877828 |
| GRMZM2G12 |                                                     |  |              |
| 8215      | F-box protein interaction domain containing protein |  | -1.362877828 |
| GRMZM2G12 |                                                     |  |              |
| 9288      | Hypothetical protein LOC100383825                   |  | -1.207120362 |
| GRMZM2G13 |                                                     |  |              |
| 0109      | hypothetical protein LOC100193239                   |  | 1.167996648  |
| GRMZM2G13 |                                                     |  |              |
| 2913      | F-box domain containing protein                     |  | -1.362877828 |
| GRMZM2G13 |                                                     |  |              |
| 3021      | hypothetical protein LOC100382330                   |  | 1.280304018  |
| GRMZM2G13 |                                                     |  |              |
| 3428      | hypothetical protein LOC100273107                   |  | -25.21323981 |
| GRMZM2G13 |                                                     |  |              |
| 3895      | hypothetical protein LOC100383858                   |  | 9.171768553  |
| GRMZM2G13 |                                                     |  |              |
| 4550      | Putative uncharacterized protein                    |  | 1.051331082  |
| GRMZM2G13 |                                                     |  |              |
| 5002      | hypothetical protein LOC100273406                   |  | -1.146056355 |
| GRMZM2G13 |                                                     |  |              |
| 5978      | hypothetical protein LOC100274630                   |  | 1.868481222  |
| GRMZM2G13 |                                                     |  |              |
| 7029      | Uncharacterized protein                             |  | 1.510644232  |
| GRMZM2G13 |                                                     |  |              |
| 7451      | hypothetical protein LOC100216731                   |  | 1.343818673  |
| GRMZM2G13 |                                                     |  |              |
| 7582      | LOC100281166                                        |  | 1.467482969  |

|           |                                        |  |              |
|-----------|----------------------------------------|--|--------------|
| GRMZM2G13 |                                        |  |              |
| 9066      | F-box domain containing protein        |  | 1.614231265  |
| GRMZM2G14 |                                        |  |              |
| 1472      | hypothetical protein LOC100274409      |  | -1.362877828 |
| GRMZM2G14 |                                        |  |              |
| 2043      | Uncharacterized protein                |  | 1.231961011  |
| GRMZM2G14 |                                        |  |              |
| 4615      | hypothetical protein LOC100272343      |  | -1.542481882 |
| GRMZM2G14 |                                        |  |              |
| 6694      | unknown                                |  | 1.956643958  |
| GRMZM2G14 |                                        |  |              |
| 7402      | hypothetical protein LOC100193397      |  | 1.073930718  |
| GRMZM2G14 |                                        |  |              |
| 7800      | unknown                                |  | 1.020567701  |
| GRMZM2G14 |                                        |  |              |
| 9153      | Uncharacterized protein                |  | 1.191978503  |
| GRMZM2G15 |                                        |  |              |
| 0169      | unknown                                |  | 1.236490279  |
| GRMZM2G15 |                                        |  |              |
| 1496      | hypothetical protein LOC100382223      |  | 1.926071396  |
| GRMZM2G15 |                                        |  |              |
| 2290      | Putative uncharacterized protein       |  | -1.548724804 |
| GRMZM2G15 |                                        |  |              |
| 5849      | transport inhibitor response 1 protein |  | -1.829317298 |
| GRMZM2G15 |                                        |  |              |
| 6490      | hypothetical protein LOC100382083      |  | -1.567309502 |
| GRMZM2G15 |                                        |  |              |
| 6506      | hypothetical protein LOC100304291      |  | -2.271463046 |
| GRMZM2G15 |                                        |  |              |
| 7132      | hypothetical protein LOC100191208      |  | -1.943362828 |
| GRMZM2G15 |                                        |  |              |
| 7631      | F-box domain containing protein        |  | -3.738179184 |
| GRMZM2G16 | Putative uncharacterized protein       |  | 1.39082341   |



|           |                                                                  |  |              |
|-----------|------------------------------------------------------------------|--|--------------|
| 3726      |                                                                  |  |              |
| GRMZM2G16 |                                                                  |  |              |
| 5007      | hypothetical protein LOC100274214                                |  | 2.538348919  |
| GRMZM2G16 |                                                                  |  |              |
| 9227      | F-box domain containing protein                                  |  | 2.934965937  |
| GRMZM2G17 |                                                                  |  |              |
| 1022      | F-box domain containing protein                                  |  | 2.934965937  |
| GRMZM2G17 |                                                                  |  |              |
| 1713      | 6-phosphofructokinase complex                                    |  | 2.201224453  |
| GRMZM2G17 |                                                                  |  |              |
| 6340      | hypothetical protein LOC100191954                                |  | 2.777735619  |
| GRMZM2G17 |                                                                  |  |              |
| 6638      | Uncharacterized protein                                          |  | 2.690385442  |
| GRMZM2G17 |                                                                  |  |              |
| 9532      | F-box domain containing protein Putative uncharacterized protein |  | 1.274393104  |
| GRMZM2G18 |                                                                  |  |              |
| 0458      | Putative uncharacterized protein                                 |  | -2.11161935  |
| GRMZM2G30 |                                                                  |  |              |
| 5864      | Lipid binding protein                                            |  | 6.918133994  |
| GRMZM2G31 |                                                                  |  |              |
| 3041      | unknown                                                          |  | -1.42482682  |
| GRMZM2G31 |                                                                  |  |              |
| 7262      | Uncharacterized protein                                          |  | -2.725755655 |
| GRMZM2G33 |                                                                  |  |              |
| 0526      | Cyclin-like F-box                                                |  | 1.318017111  |
| GRMZM2G36 |                                                                  |  |              |
| 0352      | Uncharacterized protein                                          |  | -1.294733936 |
| GRMZM2G36 |                                                                  |  |              |
| 5677      | F-box protein interaction domain containing protein              |  | 3.197016467  |
| GRMZM2G37 |                                                                  |  |              |
| 7373      | unknown                                                          |  | -1.362877828 |
| GRMZM2G37 |                                                                  |  |              |
| 9804      | unknown                                                          |  | 1.19059939   |

|                            |                                                                  |                                   |              |
|----------------------------|------------------------------------------------------------------|-----------------------------------|--------------|
| E3 ubiquitin ligases_U Box | GRMZM2G40                                                        |                                   |              |
|                            | 5474                                                             | hypothetical protein LOC100274552 | 1.320734672  |
|                            | GRMZM2G43                                                        |                                   |              |
|                            | 4518                                                             | Putative uncharacterized protein  | 2.005560057  |
|                            | GRMZM2G43                                                        |                                   |              |
|                            | 5445                                                             | hypothetical protein LOC100273081 | -1.879119429 |
|                            | GRMZM2G44                                                        |                                   |              |
|                            | 2489                                                             | hypothetical protein LOC100273804 | 1.180366736  |
|                            | GRMZM2G44                                                        |                                   |              |
|                            | 3889                                                             | unknown                           | 1.834353711  |
|                            | GRMZM2G44                                                        |                                   |              |
|                            | 7480                                                             | Uncharacterized protein           | 3.668707421  |
|                            | GRMZM2G45                                                        |                                   |              |
|                            | 9166                                                             | F-box protein GID2                | 2.934965937  |
|                            | GRMZM2G70                                                        |                                   |              |
|                            | 2889                                                             | Putative uncharacterized protein  | -1.263258453 |
|                            | GRMZM2G00                                                        |                                   |              |
|                            | 7486                                                             | ubiquitin ligase complex          | 1.074715468  |
|                            | GRMZM2G01                                                        |                                   |              |
|                            | 8059                                                             | ubiquitin ligase complex          | 7.92440803   |
| GRMZM2G01                  |                                                                  |                                   |              |
| 9777                       | Uncharacterized protein                                          | -3.407194569                      |              |
| GRMZM2G02                  |                                                                  |                                   |              |
| 0196                       | Uncharacterized protein                                          | -1.265529411                      |              |
| GRMZM2G02                  |                                                                  |                                   |              |
| 5037                       | Putative ARM repeat-containing protein containing family protein | 1.001991059                       |              |
| GRMZM2G02                  |                                                                  |                                   |              |
| 5214                       | STIP1 homology and U box-containing protein 1                    | 1.19059939                        |              |
| GRMZM2G02                  |                                                                  |                                   |              |
| 7375                       | unknown                                                          | -7.268681747                      |              |
| GRMZM2G03                  |                                                                  |                                   |              |
| 0805                       | LOC100276970                                                     | 1.195288547                       |              |
| GRMZM2G03                  | LOC100273990                                                     | 2.013886202                       |              |

|           |                                                                                |              |
|-----------|--------------------------------------------------------------------------------|--------------|
| 3521      |                                                                                |              |
| GRMZM2G03 |                                                                                |              |
| 7698      | pre-mRNA-splicing factor 19                                                    | 2.48223183   |
| GRMZM2G05 |                                                                                |              |
| 0734      | LOC100281409                                                                   | 1.570464229  |
| GRMZM2G05 |                                                                                |              |
| 5052      | Putative uncharacterized protein                                               | 1.222902474  |
| GRMZM2G05 |                                                                                |              |
| 7436      | Putative ARM repeat-containing protein containing family protein isoform 1     | 1.539823678  |
| GRMZM2G05 |                                                                                |              |
| 9042      | photoperiod responsive protein                                                 | -3.270906786 |
| GRMZM2G06 |                                                                                |              |
| 3394      | Uncharacterized protein                                                        | 1.124029508  |
| GRMZM2G06 |                                                                                |              |
| 5612      | ubiquitin-protein ligase                                                       | 3.668707421  |
| GRMZM2G07 |                                                                                |              |
| 3310      | Uncharacterized protein                                                        | 1.781943605  |
| GRMZM2G07 |                                                                                |              |
| 5104      | Uncharacterized protein                                                        | 1.385956137  |
| GRMZM2G09 |                                                                                |              |
| 2550      | unknown                                                                        | 3.179546432  |
| GRMZM2G10 |                                                                                |              |
| 0090      | ubiquitin-protein ligase                                                       | -1.817170437 |
| GRMZM2G10 |                                                                                |              |
| 4769      | Putative uncharacterized protein STIP1 homology and U box-containing protein 1 | 1.895498834  |
| GRMZM2G11 |                                                                                |              |
| 5000      | hypothetical protein LOC100383373                                              | 1.237289562  |
| GRMZM2G12 |                                                                                |              |
| 5034      | Uncharacterized protein                                                        | 3.668707421  |
| GRMZM2G12 |                                                                                |              |
| 7690      | Uncharacterized protein                                                        | -4.088633483 |
| GRMZM2G15 |                                                                                |              |
| 2857      | ubiquitin ligase complex                                                       | -1.49916561  |

|                          |                   |                                                                                  |              |
|--------------------------|-------------------|----------------------------------------------------------------------------------|--------------|
|                          | GRMZM2G15<br>2919 | hypothetical protein LOC100383857                                                | 1.877013099  |
|                          | GRMZM2G16<br>0370 | hypothetical protein LOC100381946                                                | 3.410906359  |
|                          | GRMZM2G30<br>3964 | U-box domain containing protein                                                  | -5.45151131  |
|                          | GRMZM2G30<br>4010 | Putative RING finger and ARM repeat-containing protein containing family protein | 1.385956137  |
|                          | GRMZM2G30<br>5822 | Putative U-box domain protein kinase family                                      | -1.728835763 |
|                          | GRMZM2G30<br>7567 | Uncharacterized protein                                                          | -1.109665554 |
|                          | GRMZM2G31<br>4412 | unknown                                                                          | -4.770072396 |
|                          | GRMZM2G32<br>4540 | hypothetical protein LOC100191855                                                | 1.880858453  |
|                          | GRMZM2G37<br>6085 | unknown                                                                          | -1.124374208 |
|                          | GRMZM2G38<br>9462 | unknown                                                                          | 1.687605414  |
|                          | GRMZM2G42<br>5965 | LOC100281122                                                                     | -3.407194569 |
|                          | GRMZM2G42<br>6271 | Hypothetical protein LOC100193745                                                | 3.268484794  |
|                          | GRMZM2G43<br>3433 | Putative U-box domain protein kinase family                                      | 9.538639295  |
|                          | GRMZM2G45<br>2016 | hypothetical protein LOC100279362                                                | -1.158446153 |
|                          | GRMZM2G47<br>1733 | hypothetical protein LOC100193248                                                | 3.301836679  |
|                          | GRMZM2G47<br>6914 | ubiquitin-protein ligase                                                         | 2.65981288   |
| E3 ubiquitin ligases_DDB | AC149475.2_F      | proteasome subunit alpha type 5                                                  | 1.962609336  |

|           |                                                 |             |
|-----------|-------------------------------------------------|-------------|
| G003      |                                                 |             |
| GRMZM2G00 |                                                 |             |
| 5080      | Proteasome subunit alpha type (EC 3.4.25.1)     | -1.86821455 |
| GRMZM2G01 |                                                 |             |
| 6511      | maize 20S proteasome alpha subunit              | 1.612211793 |
| GRMZM2G02 |                                                 |             |
| 7282      | hypothetical protein LOC100273594               | 1.047923343 |
| GRMZM2G02 |                                                 |             |
| 9583      | 26S proteasome non-ATPase regulatory subunit 6  | 1.928302012 |
| GRMZM2G03 |                                                 |             |
| 3626      | 26S proteasome non-ATPase regulatory subunit 14 | 1.586790527 |
| GRMZM2G03 |                                                 |             |
| 8126      | 26S proteasome regulatory complex ATPase RPT3   | 1.109210759 |
| GRMZM2G05 |                                                 |             |
| 1790      | hypothetical protein LOC100273813               | 2.736657428 |
| GRMZM2G05 |                                                 |             |
| 6569      | Putative uncharacterized protein                | 1.042449792 |
| GRMZM2G05 |                                                 |             |
| 6870      | proteasome subunit alpha type 5                 | 2.695589283 |
| GRMZM2G06 |                                                 |             |
| 1745      | hypothetical protein LOC100274928               | 1.119071132 |
| GRMZM2G07 |                                                 |             |
| 4037      | Hypothetical protein LOC100273945               | 1.247360523 |
| GRMZM2G07 |                                                 |             |
| 4549      | hypothetical protein LOC100216834               | 1.453725316 |
| GRMZM2G09 |                                                 |             |
| 0904      | 26S proteasome regulatory complex ATPase RPT3   | 2.965538499 |
| GRMZM2G09 |                                                 |             |
| 2975      | hypothetical protein LOC100274112               | 1.486541189 |
| GRMZM2G09 |                                                 |             |
| 3557      | LOC100282612                                    | 2.06781691  |
| GRMZM2G10 |                                                 |             |
| 4373      | hypothetical protein LOC100279843               | 1.536703863 |

|                |              |                                                 |              |
|----------------|--------------|-------------------------------------------------|--------------|
|                | GRMZM2G10    |                                                 |              |
|                | 7362         | hypothetical protein LOC100274445               | 1.37019128   |
|                | GRMZM2G11    |                                                 |              |
|                | 7544         | hypothetical protein LOC100272320               | -1.33896769  |
|                | GRMZM2G12    |                                                 |              |
|                | 0047         | hypothetical protein LOC100191947               | -1.194851794 |
|                | GRMZM2G12    |                                                 |              |
|                | 6956         | Hypothetical protein LOC100381699               | 3.118401308  |
|                | GRMZM2G13    |                                                 |              |
|                | 7528         | hypothetical protein LOC100273032               | 1.232207167  |
|                | GRMZM2G14    |                                                 |              |
|                | 0867         | LOC100283485                                    | 1.251489804  |
|                | GRMZM2G17    |                                                 |              |
|                | 1604         | 26S protease regulatory subunit S10B            | 1.84319397   |
|                | GRMZM2G18    |                                                 |              |
|                | 1359         | hypothetical protein LOC100272769               | 1.284047597  |
|                | GRMZM2G36    |                                                 |              |
|                | 8908         | hypothetical protein LOC100276453               | -1.037787704 |
|                | GRMZM2G40    |                                                 |              |
|                | 2002         | hypothetical protein LOC100279448               | 1.429530823  |
|                | GRMZM2G46    |                                                 |              |
|                | 7059         | 26S proteasome non-ATPase regulatory subunit 14 | 1.463241688  |
|                | AC149475.2_F |                                                 |              |
| 26S proteasome | G003         | proteasome subunit alpha type 5                 | 1.962609336  |
|                | GRMZM2G00    |                                                 |              |
|                | 5080         | hypothetical protein LOC100193140               | -1.86821455  |
|                | GRMZM2G01    |                                                 |              |
|                | 6511         | maize 20S proteasome alpha subunit              | 1.612211793  |
|                | GRMZM2G02    |                                                 |              |
|                | 7282         | 26S protease regulatory subunit 6A              | 1.047923343  |
|                | GRMZM2G02    |                                                 |              |
|                | 9583         | 26S proteasome non-ATPase regulatory subunit 6  | 1.928302012  |
|                | GRMZM2G03    | 26S proteasome non-ATPase regulatory subunit 14 | 1.586790527  |

|           |                                                                                 |              |
|-----------|---------------------------------------------------------------------------------|--------------|
| 3626      |                                                                                 |              |
| GRMZM2G03 |                                                                                 |              |
| 8126      | 26S proteasome regulatory complex ATPase RPT3                                   | 1.109210759  |
| GRMZM2G05 |                                                                                 |              |
| 6569      | Uncharacterized protein                                                         | 1.042449792  |
| GRMZM2G05 |                                                                                 |              |
| 6870      | proteasome subunit alpha type 5                                                 | 2.695589283  |
| GRMZM2G06 |                                                                                 |              |
| 1745      | hypothetical protein LOC100274928                                               | 1.119071132  |
| GRMZM2G07 |                                                                                 |              |
| 4037      | Putative uncharacterized protein                                                | 1.247360523  |
| GRMZM2G07 |                                                                                 |              |
| 4549      | hypothetical protein LOC100216834                                               | 1.453725316  |
| GRMZM2G09 |                                                                                 |              |
| 0904      | 26S proteasome regulatory complex ATPase RPT3                                   | 2.965538499  |
| GRMZM2G09 |                                                                                 |              |
| 2975      | hypothetical protein LOC100274112                                               | 1.486541189  |
| GRMZM2G09 |                                                                                 |              |
| 3557      | 26S proteasome non-ATPase regulatory subunit 6 Putative uncharacterized protein | 2.06781691   |
| GRMZM2G10 |                                                                                 |              |
| 4373      | 26S protease regulatory subunit 4                                               | 1.536703863  |
| GRMZM2G10 |                                                                                 |              |
| 7362      | 26S protease regulatory subunit 8 Putative uncharacterized protein              | 1.37019128   |
| GRMZM2G11 |                                                                                 |              |
| 7544      | hypothetical protein LOC100272320                                               | -1.33896769  |
| GRMZM2G12 |                                                                                 |              |
| 0047      | proteasome core complex, alpha-subunit complex                                  | -1.194851794 |
| GRMZM2G13 |                                                                                 |              |
| 7528      | hypothetical protein LOC100273032                                               | 1.232207167  |
| GRMZM2G14 |                                                                                 |              |
| 0867      | LOC100283485                                                                    | 1.251489804  |
| GRMZM2G17 |                                                                                 |              |
| 1604      | 26S protease regulatory subunit S10B                                            | 1.84319397   |

|                         |           |                                                   |              |
|-------------------------|-----------|---------------------------------------------------|--------------|
|                         | GRMZM2G18 |                                                   |              |
|                         | 1359      | hypothetical protein LOC100272769                 | 1.284047597  |
|                         | GRMZM2G36 |                                                   |              |
|                         | 8908      | hypothetical protein LOC100276453                 | -1.037787704 |
|                         | GRMZM2G46 |                                                   |              |
|                         | 7059      | 26S proteasome non-ATPase regulatory subunit 14   | 1.463241688  |
| Plant cysteine oxidases | GRMZM2G03 |                                                   |              |
|                         | 8677      | hypothetical protein LOC100193573                 | 9.957920143  |
|                         | GRMZM2G04 |                                                   |              |
|                         | 3417      | unknown                                           | 4.695945499  |
|                         | GRMZM2G10 |                                                   |              |
|                         | 7557      | Putative uncharacterized protein                  | 18.408279    |
|                         | GRMZM2G11 |                                                   |              |
|                         | 3355      | hypothetical protein LOC100191278                 | 2.308400175  |
|                         | GRMZM2G13 |                                                   |              |
|                         | 6250      | hypothetical protein LOC100191514                 | 1.21591446   |
|                         | GRMZM2G16 |                                                   |              |
|                         | 2175      | Cupin, RmlC-type Putative uncharacterized protein | 1.935559433  |

---



**Table S8. Primer sequences of waterlogging responsive genes identified in various pathways in RNASeq for qRT-PCR validation**

| Gene ID       | Annotation                                                      | Primer | Primer sequence        | Tm | Length | GC % | Amplicon length |
|---------------|-----------------------------------------------------------------|--------|------------------------|----|--------|------|-----------------|
| GRMZM2G136139 | Neutral/alkaline invertase                                      | F      | ACCCGAGTTCTGGTTCTTTG   | 62 | 20     | 50   | 87              |
|               |                                                                 | R      | AACATTGGACACGCCTACTT   | 62 | 20     | 45   |                 |
| GRMZM2G159587 | Glyoxylate reductase                                            | F      | CCAAGTCCAACCTCCCTAAAC  | 62 | 21     | 52.4 | 116             |
|               |                                                                 | R      | CCAAGTCCAACCTCCCTAAAC  | 62 | 21     | 52.4 |                 |
| GRMZM2G046686 | Hexokinase-1                                                    | F      | CGGTCTCTACCAAGGCTATTC  | 61 | 21     | 52.4 | 111             |
|               |                                                                 | R      | CGGTCTCTACCAAGGCTATTC  | 61 | 22     | 50   |                 |
| GRMZM2G119689 | Beta-fructofuranosidase, insoluble isoenzyme 2                  | F      | CGTGTTCCTCAGGGTGTTC    | 62 | 20     | 50   | 137             |
|               |                                                                 | R      | AGATGTCCGTGTGACAAATC   | 62 | 21     | 47.6 |                 |
| GRMZM2G430807 | metallothionein-like protein type 2                             | F      | CAGCAAAGCCCTGTAGTGATA  | 62 | 21     | 47.6 | 108             |
|               |                                                                 | R      | AAGAGCTCTCTACTCTCTCTC  | 62 | 22     | 50   |                 |
| GRMZM2G402564 | Metallothionein2                                                | F      | CTAGTGGAGGGAGTTGTCTAGT | 62 | 22     | 50   | 121             |
|               |                                                                 | R      | ACGATACCACGATGCAGATG   | 62 | 20     | 50   |                 |
| GRMZM2G034896 | hypothetical protein LOC100384248                               | F      | CACAGACACAGTTGGGAAAGA  | 62 | 21     | 47.6 | 103             |
|               |                                                                 | R      | CCAACTTTCGCAGTCACAAAC  | 62 | 21     | 47.6 |                 |
| GRMZM2G036134 | hypothetical protein LOC100191400                               | F      | CTTTCGCAGACCAAGGACAT   | 62 | 20     | 50   | 84              |
|               |                                                                 | R      | GAGCGTTCAGAGAAGTTGAG   | 62 | 21     | 52.4 |                 |
| GRMZM2G026855 | hypothetical protein LOC100273291                               | F      | GGGTTTCATCCAGAGCGATTAC | 62 | 21     | 52.4 | 104             |
|               |                                                                 | R      | ACGCTCATGTCTCCACATAC   | 62 | 21     | 47.6 |                 |
| GRMZM2G119494 | Glycoside hydrolase, family 28 Putative uncharacterized protein | F      | ACCATGAAGTGGGTGTTCTG   | 62 | 20     | 50   | 109             |
|               |                                                                 | R      | ACACGTCGCTGTAGTTGATG   | 62 | 20     | 50   |                 |
| GRMZM2G342246 | product:beta-expansin 7                                         | F      | CGTTCCTTCGATTCACTTCCT  | 62 | 21     | 47.6 | 102             |
|               |                                                                 | R      | TTAGTAGGCCGACAGGAGAA   | 62 | 20     | 50   |                 |
| GRMZM2G094523 | Putative uncharacterized protein                                | F      | GCGTTCATCGACATCTCTAAT  | 62 | 22     | 45.5 | 122             |

|                  |                                                      |   |                        |    |    |      |     |
|------------------|------------------------------------------------------|---|------------------------|----|----|------|-----|
|                  |                                                      | R | TGTGAACTGGTAAAGAGCAGAA | 62 | 22 | 40.9 |     |
| AC177897.2_FG002 | hypothetical protein LOC100274874                    | F | GAGCACAGCCACTACTAACAA  | 62 | 21 | 47.6 | 102 |
|                  |                                                      | R | GCGCATAAGGGTTGAACAAAG  | 62 | 21 | 47.6 |     |
| GRMZM2G118109    | hypothetical protein LOC100194002                    | F | CTGAGGTGAGGTGTTTCCTAAA | 62 | 22 | 45.4 | 98  |
|                  |                                                      | R | TGAGAGTCGTTGCCTCTACTA  | 62 | 21 | 47.6 |     |
|                  | Putative RING zinc finger domain superfamily protein | F | TAACCAGCTCAGCGCTATTG   | 62 | 20 | 50   | 103 |
| GRMZM2G340444    |                                                      | R | TGAGGAAAGCGGAAGAAAGG   | 62 | 20 | 50   |     |
|                  | protein binding protein (LOC100283571), mRNA         | F | GGGAGAATGCATGTTCTGACT  | 62 | 21 | 47.6 | 97  |
| GRMZM2G027120    |                                                      | R | CAGCCAAAGGACGCAAATAAG  | 62 | 21 | 47.6 |     |

---

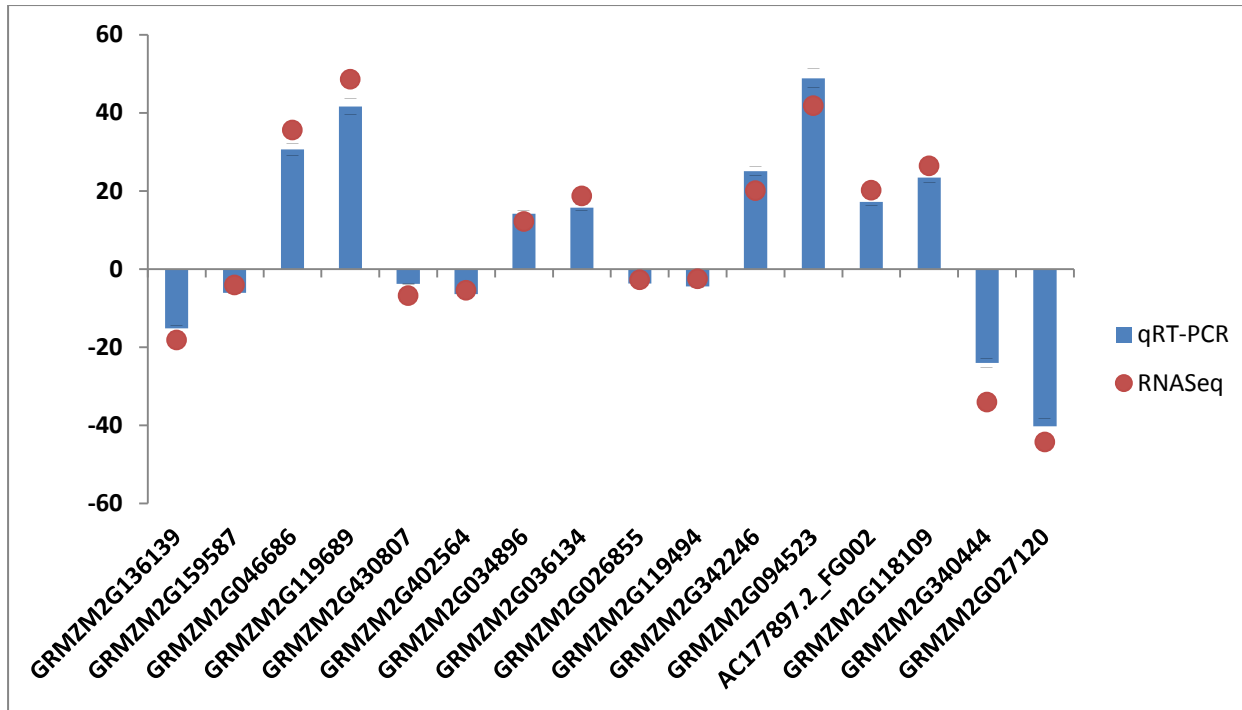

Supplementary Figure S1: Validation of selected genes operating in different pathways expressed in RNAseq by qRT-PCR. X-axis represents the gene models and Y-axis represents the log-transformed fold change expression values of genes. Error bar in the column represents the standard error.
